# Supplementary material
Source: PubMed Central journal article supplement (PMC9682295)
Supplement: NIHMS1848601-supplement-SI.pdf [file NIHMS1848601-supplement-SI.pdf]

# Alternative mechanisms for DNA engagement by BET bromodomain-containing proteins

Prakriti Kalra<sup>1</sup>, Huda Zahid<sup>1</sup>, Alex Ayoub<sup>2</sup>, Yali Dou<sup>3</sup> and William C.K. Pomerantz<sup>1,4</sup>

<sup>1</sup> Department of Chemistry, University of Minnesota, 207 Pleasant St. SE, Minneapolis, Minnesota, 55455, United States

<sup>2</sup> Department of Pathology, University of Michigan, 1301 Catherine St. Ann Arbor, Michigan 48109, United States

<sup>3</sup> Norris Comprehensive Cancer Center, University of Southern California, NOR 6314A, 1441 Eastlake Ave., Los Angeles, CA 90089, United States

<sup>4</sup> Department of Medicinal Chemistry, University of Minnesota 2231 6<sup>th</sup> St. SE, Minneapolis, MN 55455, United States

| <b>Table of Contents</b>                                                               | <b>Page</b> |
|----------------------------------------------------------------------------------------|-------------|
| Methods: Protein Purification                                                          | S-4         |
| Table S1: LC/MS Characterization of Proteins                                           | S-5         |
| Table S2: MALDI-TOF MS Characterization of Peptides                                    | S-6         |
| Table S3: DNA oligonucleotides used in NMR studies                                     | S-6         |
| Figure S1: PrOF NMR experiments with 25 bp dsDNA binding to 5FW BRDT-BD1               | S-7         |
| Figure S2: PrOF NMR experiments with 25 bp dsDNA binding to 5FW BRD4-BD1.              | S-8         |
| Figure S3: PrOF NMR experiments with 41 bp dsDNA binding to 5FW BRD4-BD1.              | S-9         |
| Figure S4: : PrOF NMR experiments with 66 bp dsDNA binding to 5FW BRD4-BD1.            | S-10        |
| Figure S5: PrOF NMR experiments with 40 bp dsDNA binding to 3FY BRD4-BD1.              | S-10        |
| Figure S6: PrOF NMR experiments with H4 K5Ac,K8Ac,K12Ac,K16Ac binding to 3FY BRD4-BD1. | S-11        |

|                                                                                                                                                                        |      |
|------------------------------------------------------------------------------------------------------------------------------------------------------------------------|------|
| Figures S7: $^1\text{H}$ - $^{15}\text{N}$ HSQC NMR experiments with 40 bp dsDNA binding to $^{15}\text{N}$ BRD4-BD1.                                                  | S-12 |
| Figure S8: Binding isotherms and chemical shift perturbations of $^1\text{H}$ - $^{15}\text{N}$ HSQC NMR titration of 40 bp dsDNA binding to $^{15}\text{N}$ BRD4-BD1. | S-13 |
| Figure S9: $^1\text{H}$ - $^{15}\text{N}$ HSQC NMR experiments with H4 K5Ac,K8Ac,K12Ac,K16Ac binding to $^{15}\text{N}$ BRD4-BD1.                                      | S-14 |
| Figure S10: CSP plot of $^1\text{H}$ - $^{15}\text{N}$ HSQC NMR experiments with H4 K5Ac,K8Ac,K12Ac,K16Ac binding to $^{15}\text{N}$ BRD4-BD1.                         | S-15 |
| Figure S11: $^1\text{H}$ - $^{15}\text{N}$ HSQC NMR experiments with 66 bp dsDNA binding to $^{15}\text{N}$ BRD4-BD1.                                                  | S-16 |
| Figure S12: CSP plot of $^1\text{H}$ - $^{15}\text{N}$ HSQC NMR experiment with 66 bp dsDNA binding to $^{15}\text{N}$ BRD4-BD1.                                       | S-17 |
| Figure S13: Binding isotherms of $^1\text{H}$ - $^{15}\text{N}$ HSQC NMR titration of 66 bp dsDNA binding to $^{15}\text{N}$ BRD4-BD1.                                 | S-18 |
| Figure S14: EMSA titrations of BRDT-BD1 interacting with unmodified nucleosomes and 40 bp dsDNA.                                                                       | S-19 |
| Figure S15: EMSA titrations of K37S K41S K45S BRDT-BD1 interacting with unmodified nucleosomes and 40 bp dsDNA                                                         | S-19 |
| Figure S16: EMSA titrations of BRD4-BD1 interacting with unmodified nucleosomes and 40 bp dsDNA.                                                                       | S-20 |
| Figure S17: EMSA titrations of His <sub>6</sub> BRD4-BD1 interacting with unmodified nucleosomes and 40 bp dsDNA.                                                      | S-20 |
| Figure S18: PrOF NMR experiments with 40 bp dsDNA binding to N140A 5FW BRD4-BD1.                                                                                       | S-21 |
| Figure S19: $^1\text{H}$ - $^{15}\text{N}$ HSQC NMR experiments with 40 bp dsDNA binding to $^{15}\text{N}$ N140A BRD4-BD1.                                            | S-22 |
| Figure S20: $^1\text{H}$ - $^{15}\text{N}$ HSQC NMR experiment with 40 bp dsDNA binding to $^{15}\text{N}$ N140 BRD4-BD1.                                              | S-23 |
| Figure S21: Binding isotherms of $^1\text{H}$ - $^{15}\text{N}$ HSQC NMR titration of 40 bp dsDNA binding to $^{15}\text{N}$ N140A BRD4-BD1.                           | S-24 |
| Figure S22: $^1\text{H}$ - $^{15}\text{N}$ HSQC NMR experiments with 40 bp dsDNA binding to $^{15}\text{N}$ N140A BRD4-BD1.                                            | S-25 |

|                                                                                                                                                                                                              |      |
|--------------------------------------------------------------------------------------------------------------------------------------------------------------------------------------------------------------|------|
| Figure S23: $^1\text{H}$ - $^{15}\text{N}$ HSQC NMR experiments with H4 K5Ac,K8Ac,K12Ac,K16Ac binding to 40 $\mu\text{M}$ of $^{15}\text{N}$ N140A BRD4-BD1.                                                 | S-26 |
| Figure S24: PrOF NMR experiments with 40 bp dsDNA binding to 5FW R68S K72S K76S BRD4-BD1.                                                                                                                    | S-27 |
| Figure S25: PrOF NMR experiments with 40 bp dsDNA binding to 3FY R68S K72S K76S BRD4-BD1.                                                                                                                    | S-28 |
| Figure S26: $^1\text{H}$ - $^{15}\text{N}$ HSQC NMR experiments with 40 bp dsDNA binding to $^{15}\text{N}$ R68S K72S K76S BRD4-BD1.                                                                         | S-29 |
| Figure S27: CSP of $^1\text{H}$ - $^{15}\text{N}$ HSQC NMR experiment with 40 bp dsDNA binding to $^{15}\text{N}$ R68S K72S K76S BRD4-BD1.                                                                   | S-30 |
| Figure S28: Binding isotherms of $^1\text{H}$ - $^{15}\text{N}$ HSQC NMR titration of 40 bp dsDNA binding to $^{15}\text{N}$ R68S K72S K76S BRD4-BD1.                                                        | S-30 |
| Figure S29: PrOF NMR experiments with nucleobases binding to 5FW BRD4-BD1.                                                                                                                                   | S-31 |
| Figure S30: PrOF NMR experiments with deoxyribonucleotides binding to 5FW BRD4-BD1.                                                                                                                          | S-32 |
| Figure S31: PrOF NMR experiments with 40 bp dsDNA binding to 5FW BRDT-BD1.                                                                                                                                   | S-33 |
| Figure S32: PrOF NMR experiments with 40 bp dsDNA binding to 5FW K37S K41S K45S BRDT-BD1.                                                                                                                    | S-34 |
| Figure S33: PrOF NMR experiments with 40 bp dsDNA binding to 3FY BRD4-BD1 pre-bound to H4 K5Ac,K8Ac,K12Ac,K16Ac.                                                                                             | S-35 |
| Figure S34: PrOF NMR experiments with 40 bp dsDNA binding to 5FW BRD4-BD1 pre-bound to H4 K5Ac,K8Ac,K12Ac,K16Ac.                                                                                             | S-36 |
| Figure S35: Ternary binding experiment of $^{15}\text{N}$ BRD4-BD1 with 40 bp dsDNA and H4 K5Ac,K8Ac,K12Ac,K16Ac                                                                                             | S-37 |
| Figure S36: $^1\text{H}$ - $^{15}\text{N}$ HSQC NMR experiments with 40 bp dsDNA binding to $^{15}\text{N}$ BRD4-BD1 pre-bound to H4 K5Ac,K8Ac,K12Ac,K16Ac.                                                  | S-38 |
| Figure S37: CSP plot of $^1\text{H}$ - $^{15}\text{N}$ HSQC NMR experiment with 40 bp dsDNA binding to 42 $\mu\text{M}$ of $^{15}\text{N}$ BRD4-BD1 pre-bound to 160 $\mu\text{M}$ H4 K5Ac,K8Ac,K12Ac,K16Ac. | S-39 |
| Figure S38: Binding isotherms of $^1\text{H}$ - $^{15}\text{N}$ HSQC NMR titration of 40 bp dsDNA binding to $^{15}\text{N}$ BRD4-BD1 pre-bound to H4 K5Ac,K8Ac,K12Ac,K16Ac.                                 | S-40 |

|                                                                                                                                            |      |
|--------------------------------------------------------------------------------------------------------------------------------------------|------|
| Figure S39: PrOF NMR experiments with 40 bp dsDNA binding 5FW BRD4-BD1 pre-bound to H4 K5Ac,K8Ac,K12Ac,K16Ac.                              | S-41 |
| Figure S40: $^1\text{H}$ - $^{15}\text{N}$ HSQC NMR experiments with 40 bp dsDNA binding to $^{15}\text{N}$ BRD4-BD1 pre-bound to (+)-JQ1. | S-42 |
| Figure S41: AlphaScreen competition experiments                                                                                            | S-43 |
| Figure S42: PrOF NMR experiments with 40 bp dsDNA binding to 5FW BRD2-BD1.                                                                 | S-44 |
| Figure S43: PrOF NMR experiments with 40 bp dsDNA binding to 5FW BRD2-BD2.                                                                 | S-45 |
| Figure S44: PrOF NMR experiment of 5FW BRD3-BD1 with (+)-JQ1 to assign $^{19}\text{F}$ resonances.                                         | S-46 |
| Figure S45: PrOF NMR experiments with 40 bp dsDNA binding to 5FW BRD3-BD1.                                                                 | S-47 |
| Figure S46: PrOF NMR experiments with 40 bp dsDNA binding to 5FW BRD3-BD2.                                                                 | S-48 |
| Figure S47: PrOF NMR experiments with 40 bp dsDNA binding to 5FW BRD4-BD2.                                                                 | S-49 |
| Figure S48: PrOF NMR experiments with 40 bp dsDNA binding to 5FW BPTF.                                                                     | S-50 |
| Figure S49: PrOF NMR experiments with 40 bp dsDNA binding to 5FW CREBBP.                                                                   | S-51 |
| Figure S50: EMSA titrations of 5FW BPTF and 5FW CREBBP with 40 bp dsDNA.                                                                   | S-52 |
| Figure S51: PrOF NMR experiments with 40 bp dsDNA binding to 5FW BRD4-T.                                                                   | S-53 |
| Figure S52: PrOF NMR experiments with 40 bp dsDNA binding to 5FW BRDT-T.                                                                   | S-54 |
| Figure S53: EMSA titrations of BRD4-T with (A) unmodified nucleosomes and (B) 40 bp dsDNA.                                                 | S-55 |
| Figure S54: EMSA titration of BRDT-T with the unmodified nucleosome.                                                                       | S-55 |



|                                                                        |      |
|------------------------------------------------------------------------|------|
| Figure S55: EMSA titration of BRD4-BD2 with the unmodified nucleosome. | S-56 |
| HPLC Purity Traces of Peptides                                         | S-56 |
| References                                                             | S-57 |

## Methods:

### Protein Purification

To the cell pellet was added 40 mL of lysis buffer (50 mM phosphate, 300 mM NaCl, pH 7.4) and 40 mg phenylmethanesulfonyl fluoride (PMSF) and the mixture was allowed to thaw at room temperature for 30 min. Cells were put on ice and sonicated in 30 second intervals followed by 60 s of cooling for a total of 12 min sonication time. The lysed cells were centrifuged at 100000  $\times$  g for 30 min. The supernatant was decanted from the pelleted cell debris and filtered using Whatman filter paper. Ni affinity purification was done using a Ni HisTrap FF 5 mL column (GE Healthcare) on an AKTA Fast Protein Liquid Chromatography (FPLC) system by monitoring the absorbance at 280 nm. Proteins were eluted with a 0-100% gradient of wash buffer (50 mM phosphate, 100 mM NaCl, 40 mM imidazole, pH 7.4) and elution buffer (50 mM phosphate, 100 mM NaCl, 400 mM imidazole, pH 7.4) across 20 column volumes. Purified protein was then buffer exchanged into storage buffer (50 mM HEPES, 100 mM NaCl, pH 7.4) using a HiPrep desalting column (GE Healthcare) equilibrated with 1 column volume of buffer. The hexahistidine (His<sub>6</sub>) tag was removed by adding His<sub>6</sub>-Tobacco Etch Virus (TEV) protease and incubating for 4-16 h at 4°C. Nickel nitriloacetic acid (Ni-NTA) affinity resin was added, incubated for 2-24 h at 4°C, then filtered to remove the TEV. Protein purity was assessed using SDS-polyacrylamide gel electrophoresis (12% Bis-Tris, 1.0 mM gels; running conditions: 120 V, 90 min in MES buffer). Protein was concentrated to ~25-35  $\mu$ M using Amicon Ultra-15 (Millipore) centrifugal filters with

either a 3 kDa or a 10 kDa molecular weight cut off (MWCO = 3000 Da or 10000 Da), flash frozen and stored at -20°C. Quadrupole Time-of-Flight (Q-TOF) LC/MS was used to confirm the identity of the protein and determine percent fluorine incorporation using the following equation.

$$\% \text{ Incorporation} = \frac{(0F \text{ protein} * 0) + (1F \text{ protein} * 1) + \dots + (nF \text{ protein} * n)}{(0F \text{ protein} * n) + (1F \text{ protein} * n) + \dots + (nF \text{ protein} * n)} * 100$$

where (0F protein) denotes the integration value of the mass peak with 0 fluorine and so on. n is the number of fluorine nuclei incorporated.

Protein masses and fluorine incorporation are shown in table S1.

**Table S1: Masses and percent fluorine incorporation determined by LC/MS for bromodomains expressed in this study.**

| Protein                                 | Calculated m/z (Da) | Observed m/z (Da) | % Fluorine Incorporation |
|-----------------------------------------|---------------------|-------------------|--------------------------|
| 5FW BRD4-BD1                            | 15137               | 15136             | 98                       |
| 5FW BRDT-BD1                            | 14185               | 14184             | 95                       |
| His <sub>6</sub> 3FY BRD4-BD1           | 17693               | 17694             | 98                       |
| <sup>15</sup> N BRD4-BD1                | 15253               | 15253             | N.A.                     |
| 5FW N140A BRD4-BD1                      | 15093               | 15094             | 98                       |
| <sup>15</sup> N N140A BRD4-BD1          | 15210               | 15210             | N.A.                     |
| 5FW R68S K72S K76S BRD4-BD1             | 14986               | 14984             | 98                       |
| 3FY R68S K72S K76S BRD4-BD1             | 15058               | 15057             | 98                       |
| <sup>15</sup> N R68S K72S K76S BRD4-BD1 | 15092               | 15093             | N.A.                     |
| <sup>15</sup> N BRDT-BD1                | 14309               | 14309             | N.A.                     |
| 5FW K37S K41S K45S BRDT-BD1             | 14025               | 14023             | 98                       |
| Unlabeled BRD4-BD1                      | 15083               | 15084             | N.A.                     |
| 5FW BPTF BD                             | 16922               | 16921             | 99                       |
| 5FW BRD4-BD2                            | 15054               | 15054             | 95                       |
| Unlabeled BRD4-BD2                      | 13182               | 13183             | N.A.                     |
| His <sub>10</sub> 5FW BRD3-BD1          | 17639               | 17638             | 98                       |

|                                 |       |       |      |
|---------------------------------|-------|-------|------|
| His <sub>10</sub> 5FW BRD3-BD2  | 16317 | 16313 | 98   |
| His <sub>10</sub> 5FW BRD2-BD1  | 17891 | 17888 | 98   |
| His <sub>10</sub> 5FW BRD2-BD2  | 15835 | 15831 | 98   |
| His <sub>10</sub> 5FW CREBBP BD | 16699 | 16699 | 99   |
| 5FW BRD4-T                      | 47938 | 47936 | 94   |
| Unlabeled BRDT-T                | 47418 | 47418 | N.A. |
| His <sub>10</sub> -5FW BRDT-T   | 49466 | 49458 | 99   |

**Table S2: Peptide theoretical and observed mass using MALDI-TOF MS.**

| Peptide                  | Sequence                                                                    | Calculated [M+H] <sup>+</sup> | Observed [M+H] <sup>+</sup> |
|--------------------------|-----------------------------------------------------------------------------|-------------------------------|-----------------------------|
| H4 K5ac,K8ac,K12ac,K16ac | H <sub>2</sub> N-<br>YSGRGGKacGGKacGLGKacGGAKac<br>RHRK-C(O)NH <sub>2</sub> | 2322.5                        | 2322.36                     |

**Table S3: DNA oligonucleotides used in NMR studies.**

| DNA oligonucleotides | DNA sequences                                                                                                                                                                        |
|----------------------|--------------------------------------------------------------------------------------------------------------------------------------------------------------------------------------|
| 25 bp dsDNA          | Forward-5'-CGAAGTGGCCGAGTGGTCTATGGCG-3'<br>Reverse- 5'-CGCCATAGACCACTCGGCCACTTCG-3'                                                                                                  |
| 40 bp dsDNA          | Forward- 5'-CAGGCTGGTCTTGA<br>ACTCCTGACCTCAGATGATCCATGTG-3'<br>Reverse- 5'-C<br>ACATGGATCATCTGAGGTCAGGAGTTCAAGAC<br>CAGCCTG-3'                                                       |
| 41 bp dsDNA          | Forward-5'-GTTTG GTGAA CCAAC ACTAC GGAAT AAAAC AGGCC<br>TCAAGG-3'<br>Reverse-5'-CCTTG AGGCC TGTTT TATTC CGTAG TGTTG GTTCA<br>CCAAAC-3'                                               |
| 66 bp dsDNA          | Forward-5'-<br>CGATATAGTGTAACGGCTATCACATCACGCTTTCACCGTGGAGA<br>CCGGGGTTCGACTCCCCGTATC-3'<br>Reverse-5'-<br>GATACGGGGAGTCGAACCCCGGTCTCCACGGTGAAAGCGTGAT<br>GTGATAGCCGTTACACTATATCG-3' |

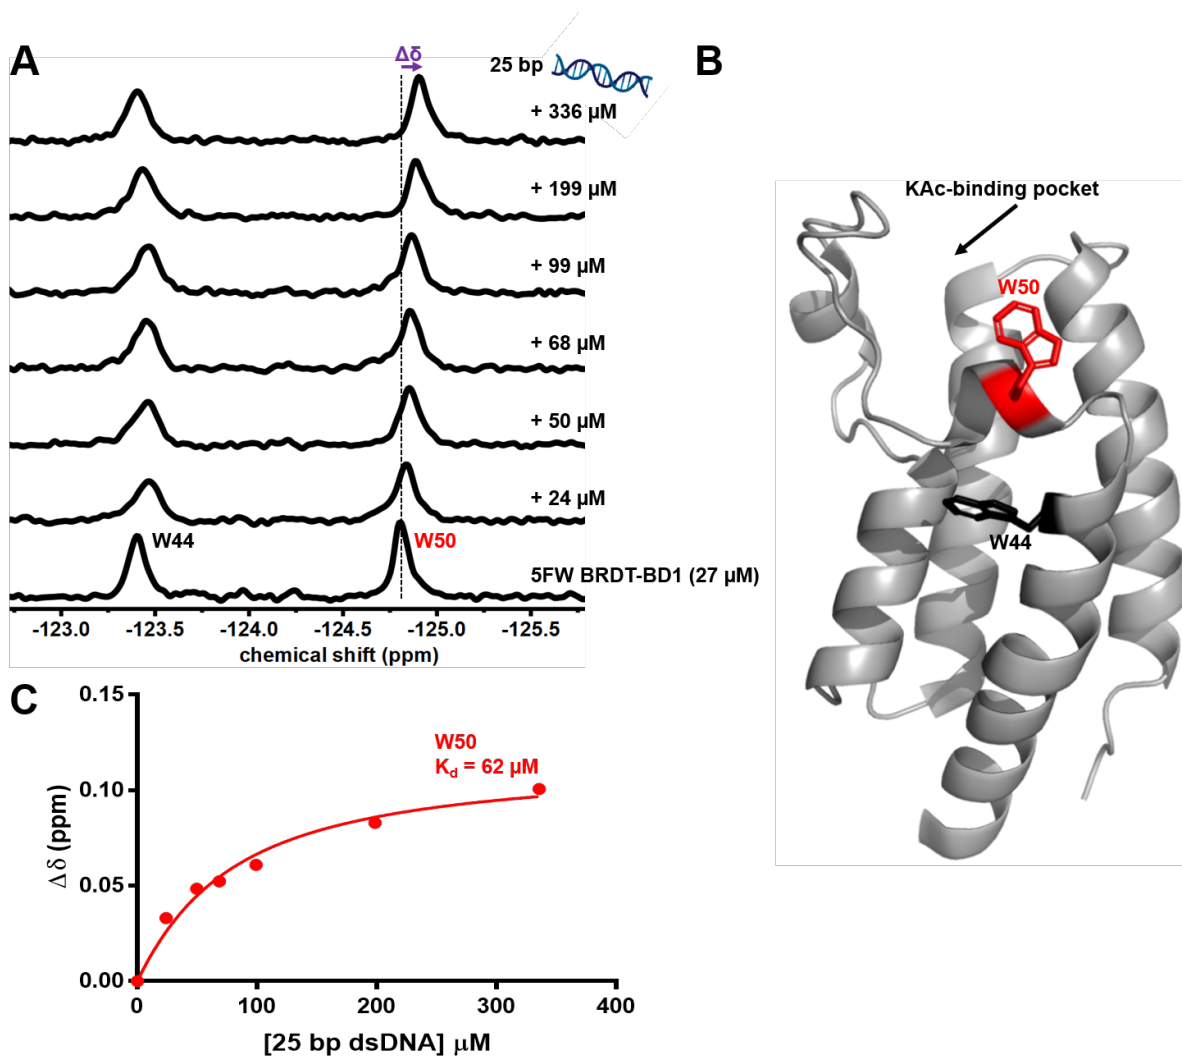

**Figure S1:** ProOF NMR experiments with 25 bp dsDNA binding to 5FW BRDT-BD1. (A) Stacked  $^{19}\text{F}$  NMR spectra, (B) X-ray crystal structure of BRDT-BD1 (PDB ID: 7L73) showing W50 around KAc-binding pocket, and W44, colored red and black respectively (C) Binding isotherm of 25 bp dsDNA (24-336  $\mu\text{M}$ ) with 27  $\mu\text{M}$  5FW BRDT-BD1. W50 is the WPF shelf tryptophan in BD1 of BRDT, colored red. Change in the chemical shift ( $\Delta\delta$ ) is shown in purple and is indicated by the dashed line.

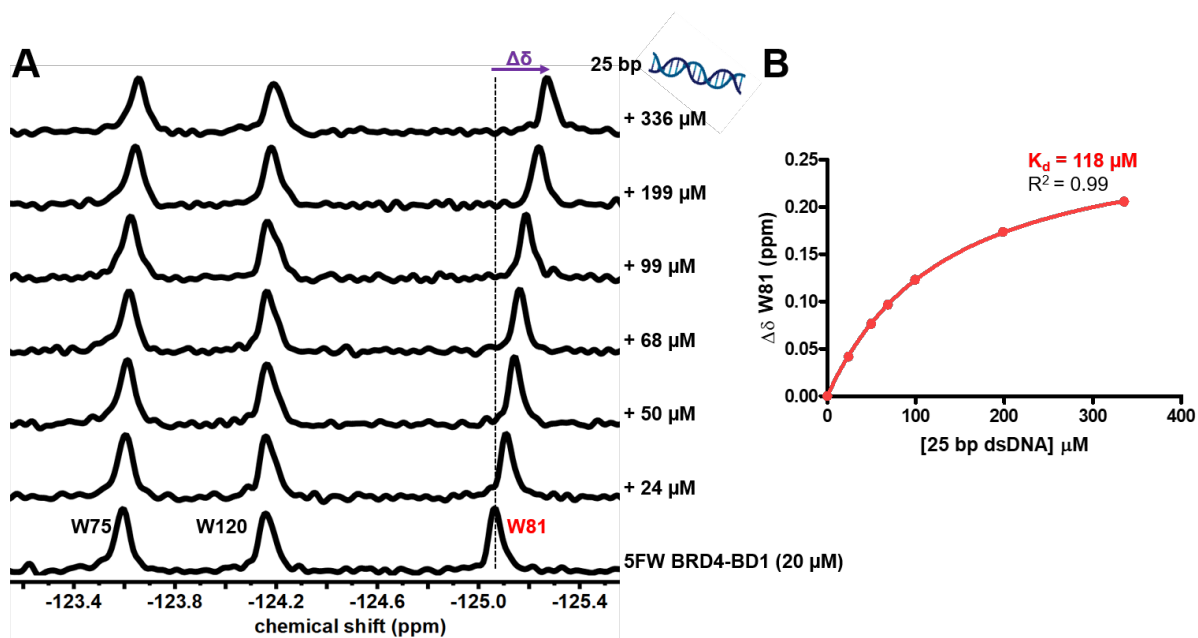

**Figure S2:** PrOF NMR experiments with 25 bp dsDNA binding to 5FW BRD4-BD1. (A) Stacked <sup>19</sup>F NMR spectra and (B) binding isotherm of 25 bp dsDNA (24 -336 μM) with 20 μM 5FW BRD4-BD1. W81 is the WPF shelf tryptophan in BD1 of BRD4, colored red. Change in the chemical shift ( $\Delta\delta$ ) is shown in purple and is indicated by the dashed line.

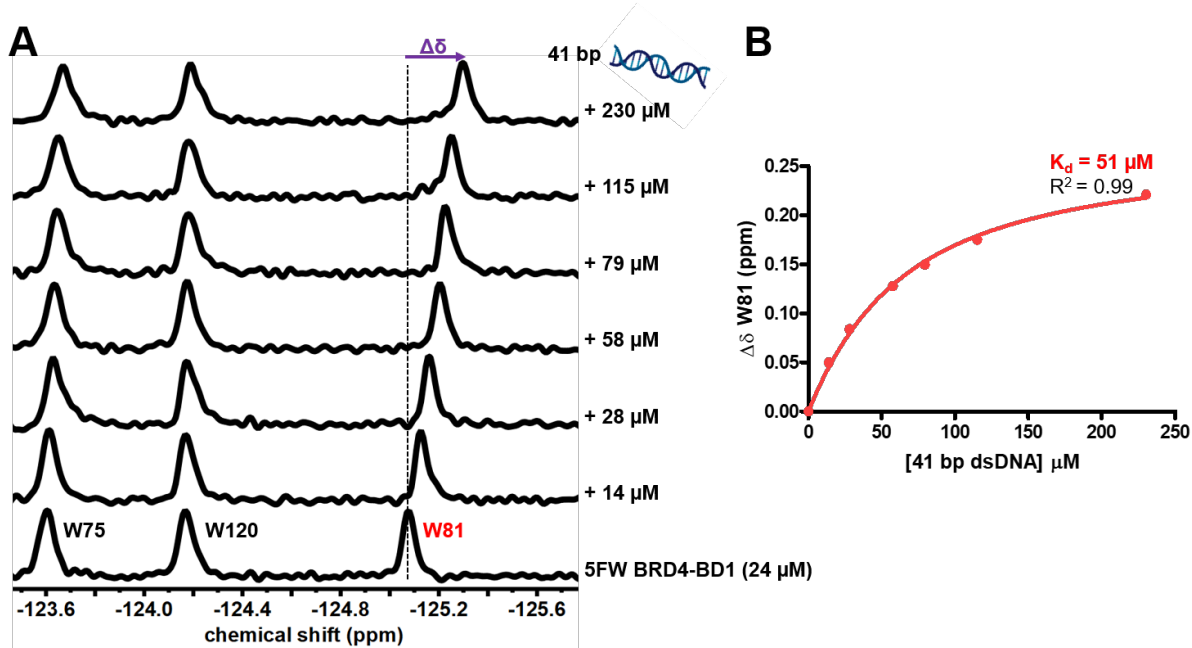

**Figure S3:** PrOF NMR experiments with 41 bp dsDNA binding to 5FW BRD4-BD1. (A) Stacked  $^{19}\text{F}$  NMR spectra and (B) binding isotherm of 41 bp dsDNA (14-230  $\mu\text{M}$ ) with 24  $\mu\text{M}$  5FW BRD4-BD1. W81 is the WPF shelf tryptophan in BD1 of BRD4, colored red. Change in the chemical shift ( $\Delta\delta$ ) is shown in purple and is indicated by the dashed line.

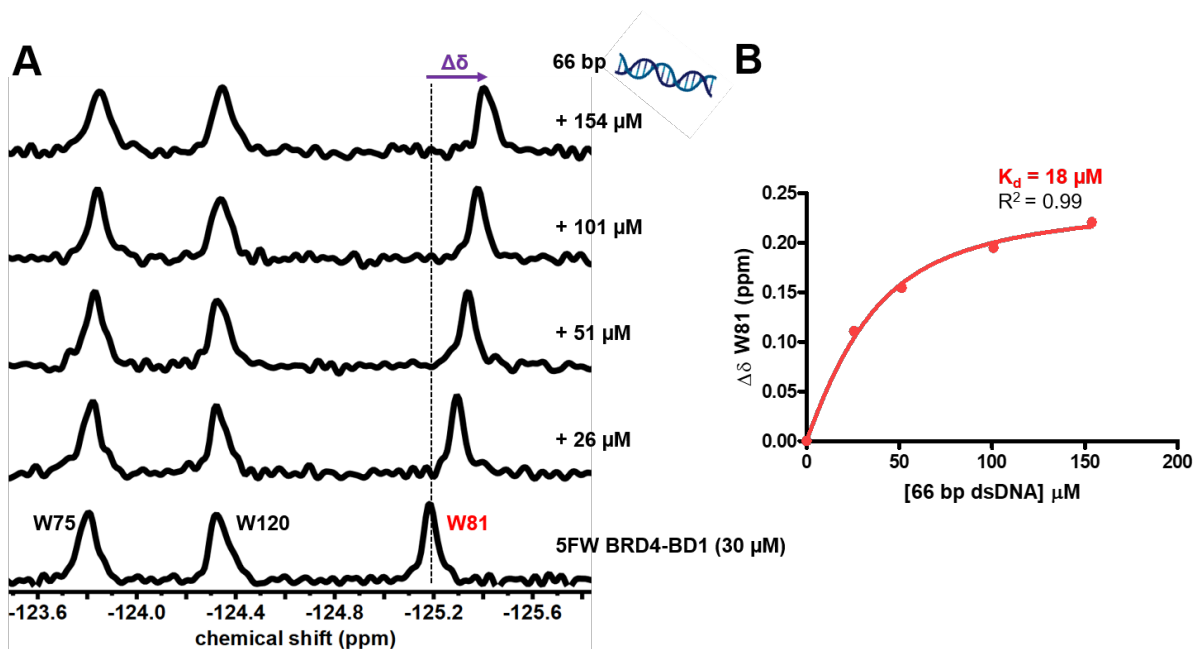

**Figure S4:** PrOF NMR experiments with 66 bp dsDNA binding to 5FW BRD4-BD1. (A) Stacked  $^{19}\text{F}$  NMR spectra and (B) binding isotherm of 66 bp dsDNA (26-154  $\mu\text{M}$ ) with 30  $\mu\text{M}$  5FW BRD4-BD1. W81 is the WPF shelf tryptophan in BD1 of BRD4, colored red. Change in the chemical shift ( $\Delta\delta$ ) is shown in purple and is indicated by the dashed line.

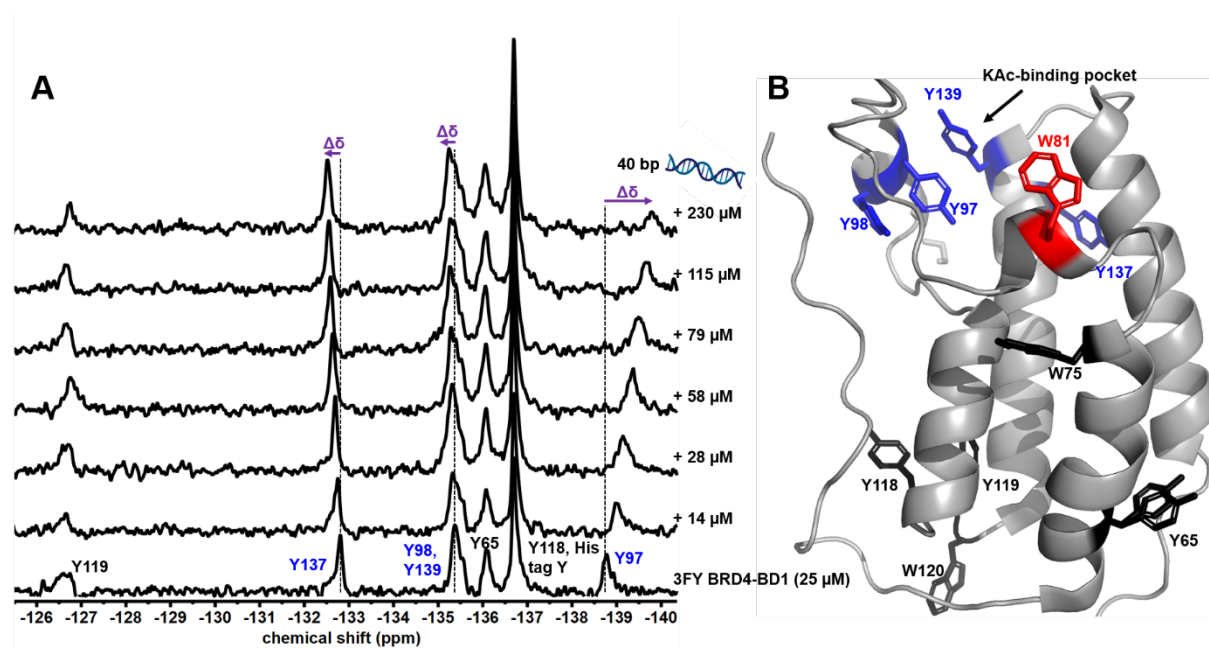

**Figure S5:** PrOF NMR experiments with (A) 40 bp dsDNA (14-230  $\mu\text{M}$ ) binding to 25  $\mu\text{M}$  3FY BRD4-BD1. (B) X-ray crystal structure of BRD4-BD1 (PDB ID: 3UVW) showing Y97, Y98, Y137, Y139, and W81 are around the KAc-binding site in BD1 of BRD4, colored blue and red respectively. Y65, Y118, Y119, W75, and W120 are shown in black. Change in the chemical shift ( $\Delta\delta$ ) is shown in purple and is indicated by the dashed line.

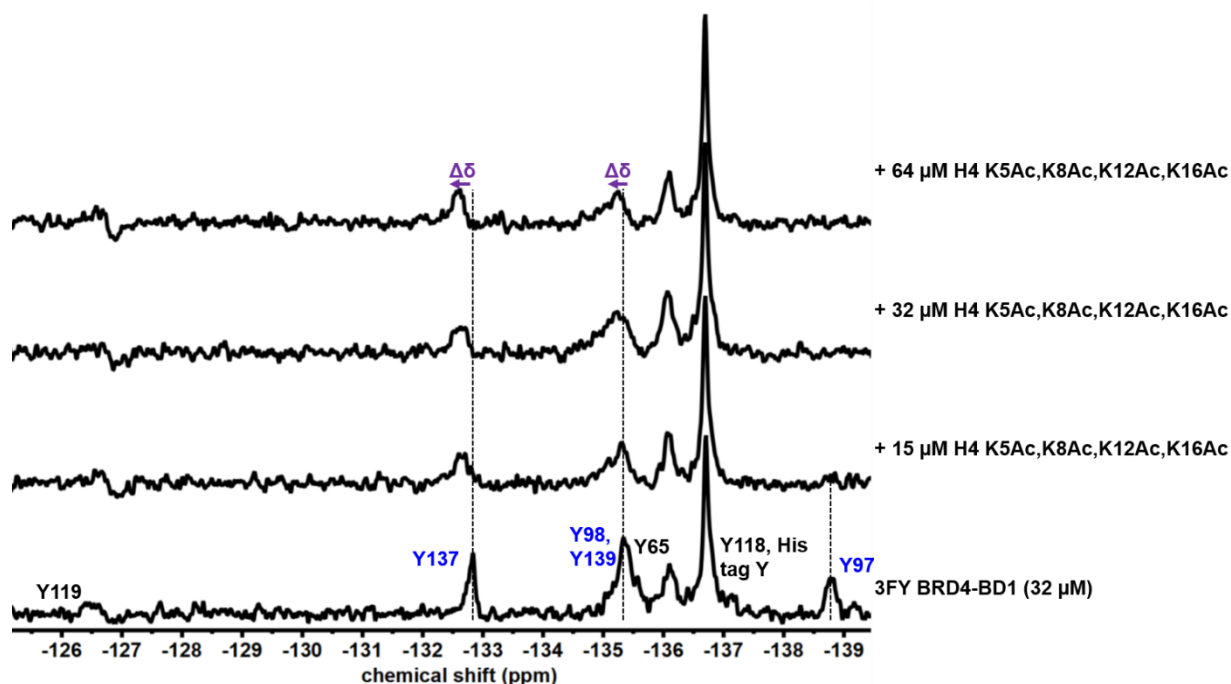

**Figure S6:** PrOF NMR experiments with H4 K5Ac,K8Ac,K12Ac,K16Ac binding to 32 μM 3FY BRD4-BD1. Y97, Y98, Y137, and Y139 are around the KAc-binding site in BD1 of BRD4, colored blue. Change in the chemical shift ( $\Delta\delta$ ) is shown in purple. Dashed line is indicating either  $\Delta\delta$  (Y137, Y98, Y139) or broadening due to intermediate chemical exchange (Y97).



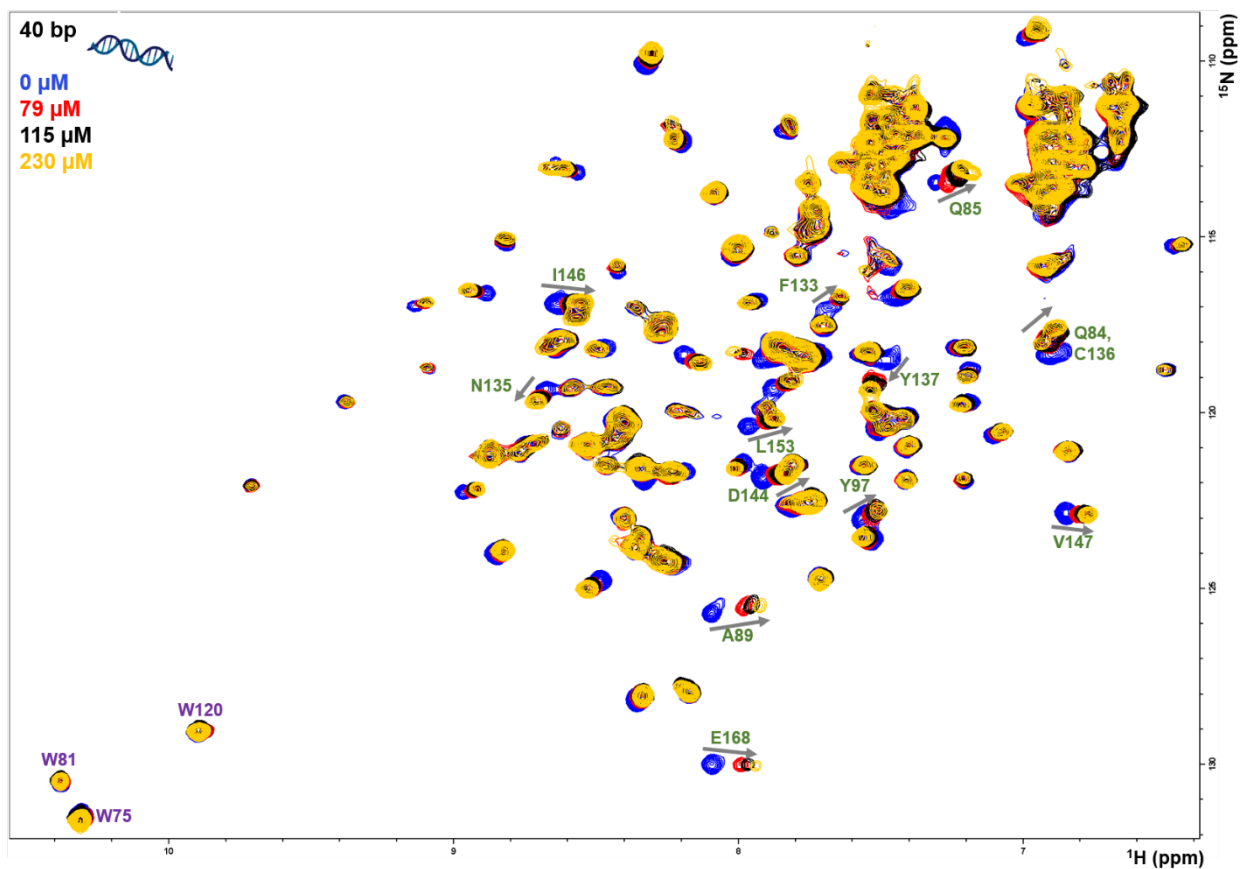

**Figure S7:**  $^1\text{H}$ - $^{15}\text{N}$  HSQC NMR experiments with 40 bp dsDNA binding to 44  $\mu\text{M}$  of  $^{15}\text{N}$  BRD4-BD1. Spectra are color coded according to DNA concentrations as shown in the legend. Titrations were performed at DNA concentrations of 0  $\mu\text{M}$ , 14  $\mu\text{M}$ , 28  $\mu\text{M}$ , 58  $\mu\text{M}$ , 79  $\mu\text{M}$ , 115  $\mu\text{M}$ , and 230  $\mu\text{M}$ . For clarity, only 4 points are displayed, and spectra are color coded accordingly as shown in the legend. Residues that are perturbed greater than the average plus one standard deviation are labelled in green, and the chemical shift perturbation ( $\Delta\delta$ ) is shown in grey. Cross-peaks from the indole NH of tryptophan sidechains are shown in purple.

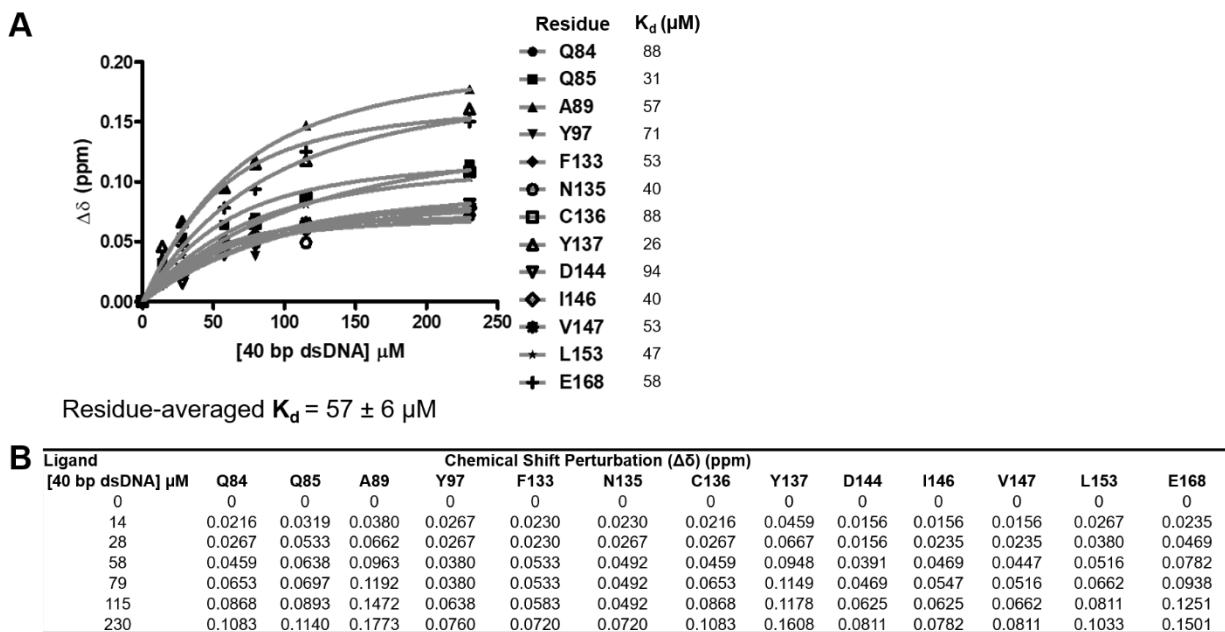

**Figure S8:** (A) Binding isotherms of  $^1\text{H}$ - $^{15}\text{N}$  HSQC NMR titration of 40 bp dsDNA binding to 44  $\mu\text{M}$  of  $^{15}\text{N}$  BRD4-BD1. (B) Chemical shift perturbations of significant residues to plot residue-averaged  $K_d$ .

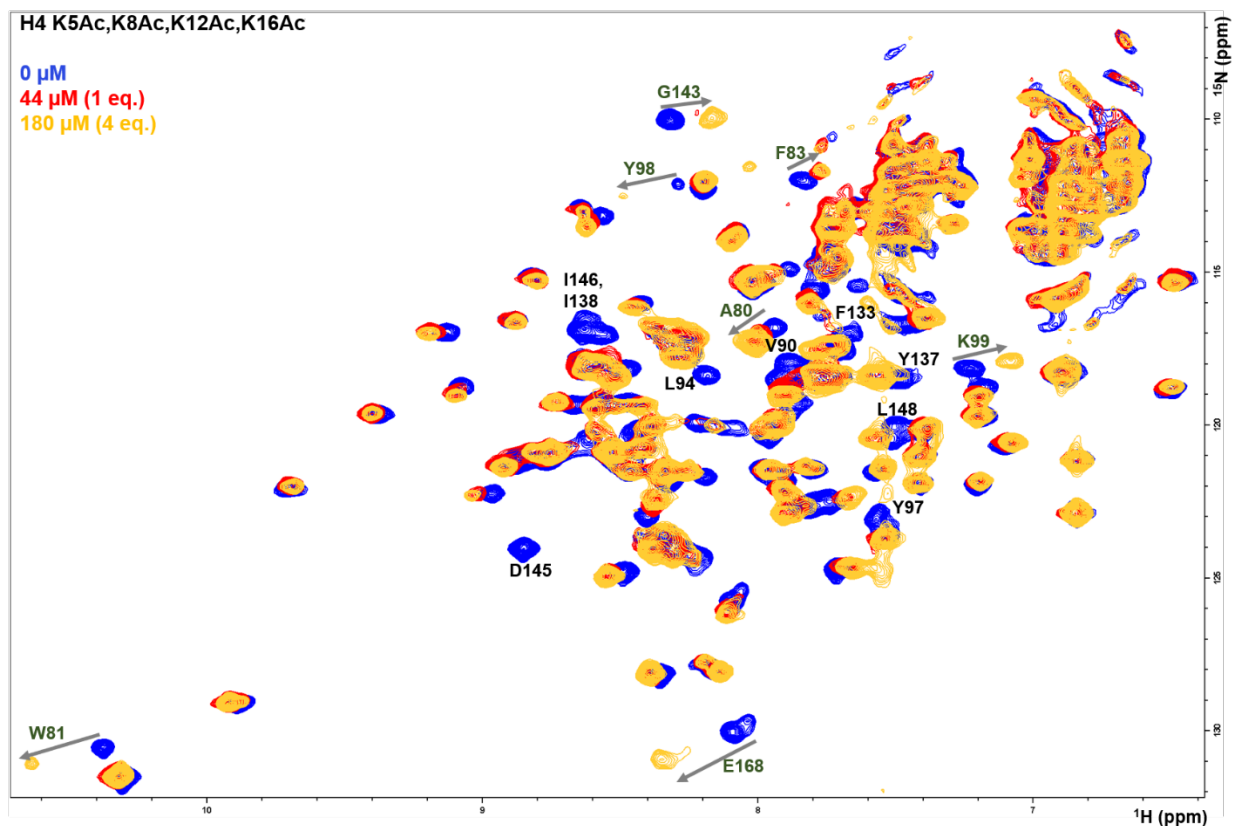

**Figure S9:**  $^1\text{H}$ - $^{15}\text{N}$  HSQC NMR experiments with H4 K5Ac,K8Ac,K12Ac,K16Ac binding to 44  $\mu\text{M}$  of  $^{15}\text{N}$  BRD4-BD1. Spectra are color coded according to H4 peptide concentrations as shown in the legend. Titrations were performed at H4 peptide concentrations of 0  $\mu\text{M}$ , 44  $\mu\text{M}$ , and 180  $\mu\text{M}$ . Residues that are perturbed greater than the average plus one standard deviation are labelled in green and the residues that are broadened to baseline in the ligand-bound state are labelled in black. The chemical shift perturbation ( $\Delta\delta$ ) is shown in grey.

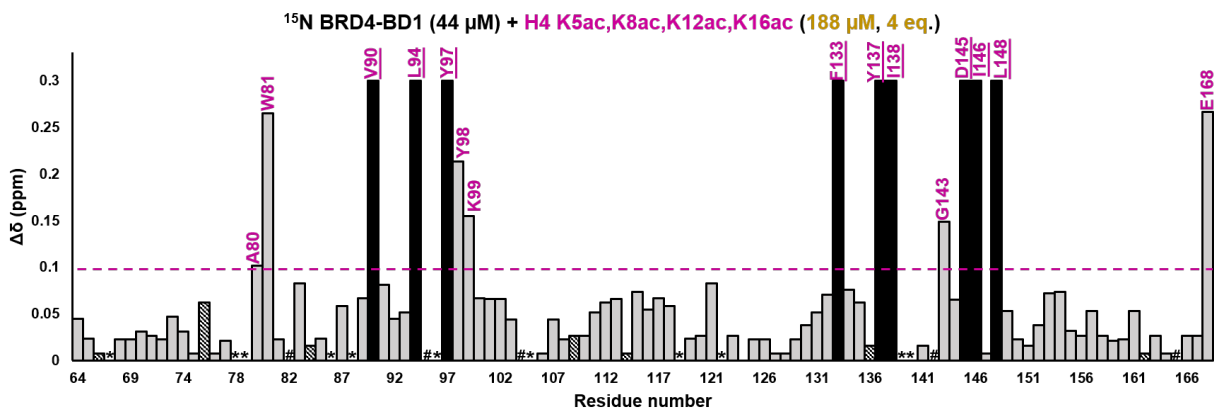

**Figure S10:** <sup>1</sup>H-<sup>15</sup>N HSQC NMR experiments with H4 K5Ac,K8Ac,K12Ac,K16Ac binding to 44 μM of <sup>15</sup>N BRD4-BD1. Normalized CSPs are plotted as a function of residue upon titration H4 K5Ac,K8Ac,K12Ac,K16Ac for the peptide concentration of 188 μM (4 eq.). Residues that are perturbed greater than the average plus one standard deviation are labeled in pink. A pink line marks this level of significance. Underlined residues are broadened to baseline in the ligand-bound state and are arbitrarily assigned CSPs of 0.3 ppm and are shown as black bars. Dashed bars (L66, W75, Q84, T109, L114, C136, and M162) indicate CSPs at 44 μM (1 eq.) of peptide concentration as the chemical shift at 188 μM could not be assigned. \* indicates missing resonance and # indicates proline residue.

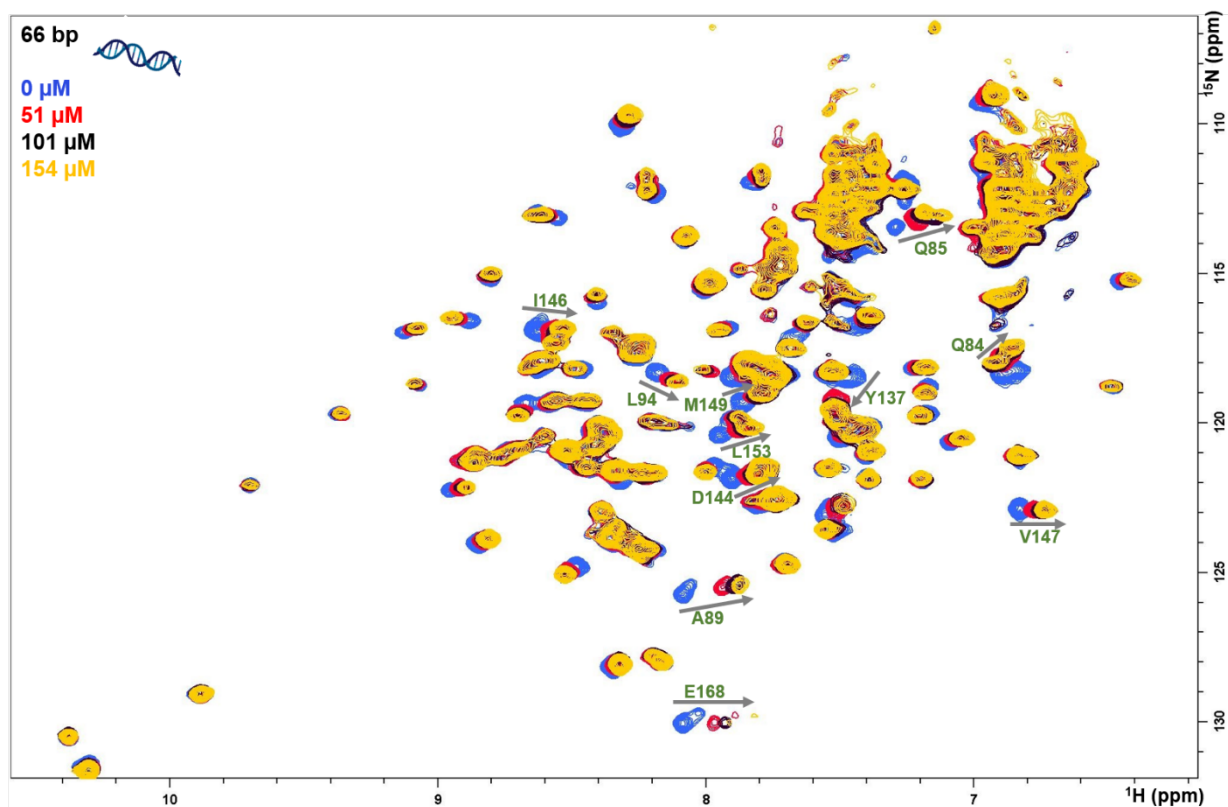

**Figure S11:**  $^1\text{H}$ - $^{15}\text{N}$  HSQC NMR experiments with 66 bp dsDNA binding to 44  $\mu\text{M}$  of  $^{15}\text{N}$  BRD4-BD1. Spectra are color coded according to DNA concentrations as shown in the legend. Titrations were performed at DNA concentrations of 0  $\mu\text{M}$ , 14  $\mu\text{M}$ , 26  $\mu\text{M}$ , 51  $\mu\text{M}$ , 101  $\mu\text{M}$ , and 154  $\mu\text{M}$ . For clarity, only 4 points are displayed, and spectra are color coded accordingly as shown in the legend. Residues that are perturbed greater than the average plus one standard deviation are labelled in green, and the chemical shift perturbation ( $\Delta\delta$ ) is shown in grey.

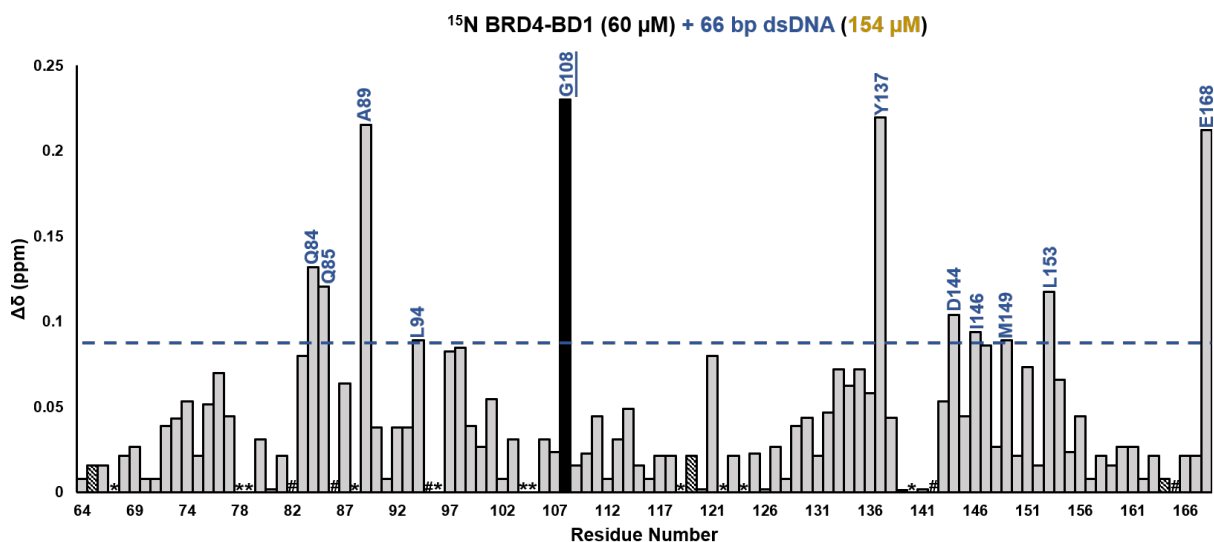

**Figure S12:** <sup>1</sup>H-<sup>15</sup>N HSQC NMR experiment with 66 bp dsDNA binding to <sup>15</sup>N BRD4-BD1. Normalized CSPs are plotted as a function of residue upon titration of 66 bp dsDNA for the DNA concentration of 154 μM and residues that are perturbed greater than the average plus one standard deviation are labeled in blue. A blue dashed line marks this level of significance. Dashed bars indicate a CSP at a lower concentration of DNA (26 μM for L164, 51 μM for Y65 and 101 μM for W120 side-chain indole NH resonance) as the chemical shift at 154 μM could not be assigned. These CSPs were also accounted for average and standard deviation calculations. Underlined residue (G108) is broadened to baseline in the ligand-bound state and is arbitrarily assigned a CSP of 0.23 ppm and is shown as a black bar. \* indicates missing resonance and # indicates proline residue.

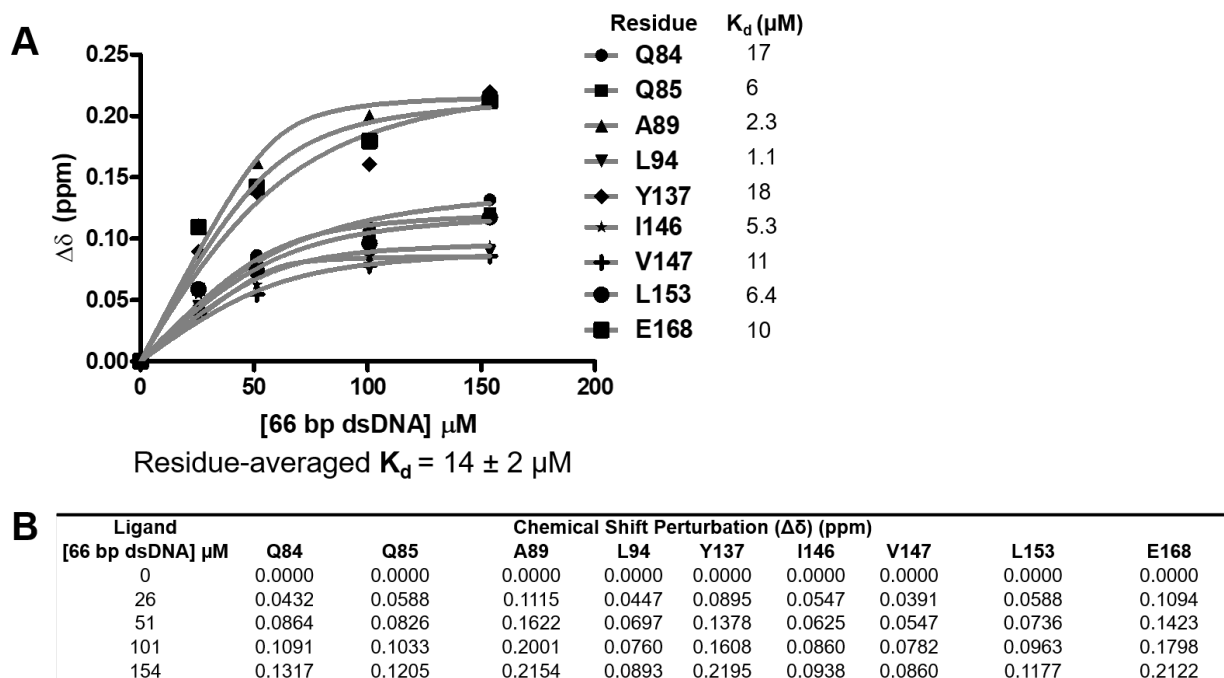

**Figure S13:** (A) Binding isotherms of  $^1\text{H}$ - $^{15}\text{N}$  HSQC NMR titration of 66 bp dsDNA binding to 60  $\mu\text{M}$  of  $^{15}\text{N}$  BRD4-BD1. (B) Chemical shift perturbations of significant residues to plot residue-averaged  $K_d$ . Though a one-site ligand-binding model was used for  $K_d$  calculations, additional binding models might be needed to fit the CSPs for 66 bp dsDNA as this sequence was previously found to bind bivalently to BRD4-BD1.<sup>1</sup>

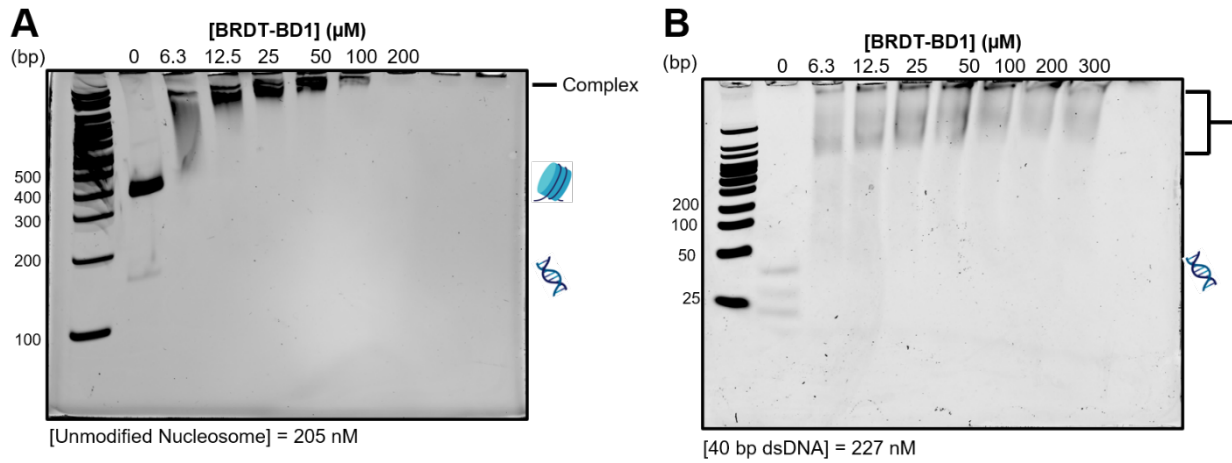

**Figure S14:** EMSA titrations of BRDT-BD1 interacting with (A) unmodified nucleosomes and (B) 40 bp dsDNA. Shifted bands containing BRDT-BD1 complexes with either nucleosomes or DNA are indicated.

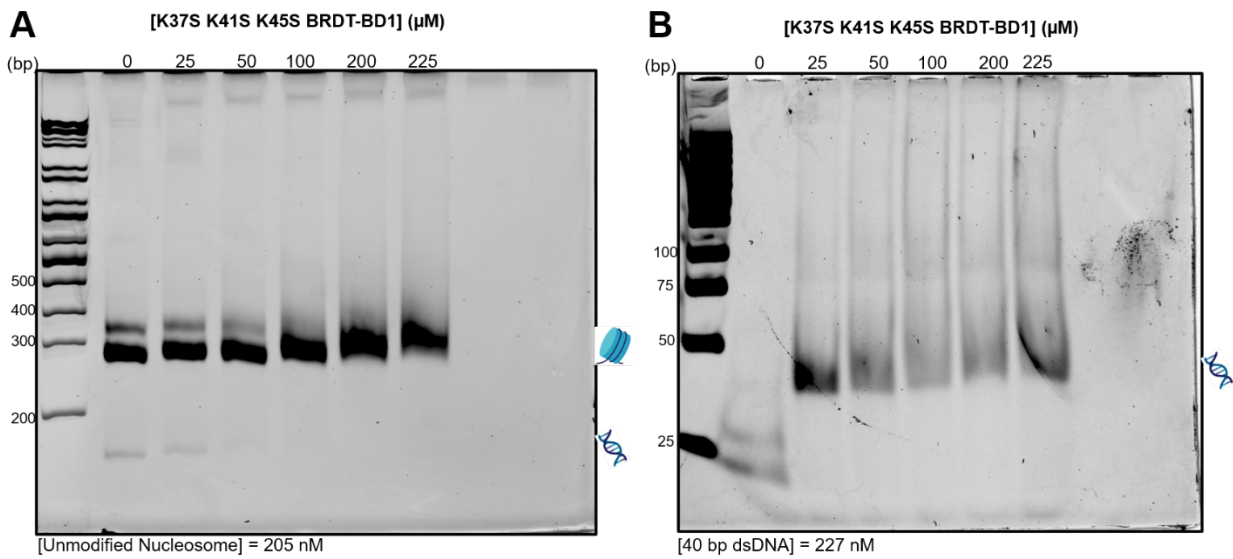

**Figure S15:** EMSA titrations of K37S K41S K45S BRDT-BD1 interacting with (A) unmodified nucleosomes and (B) 40 bp dsDNA.



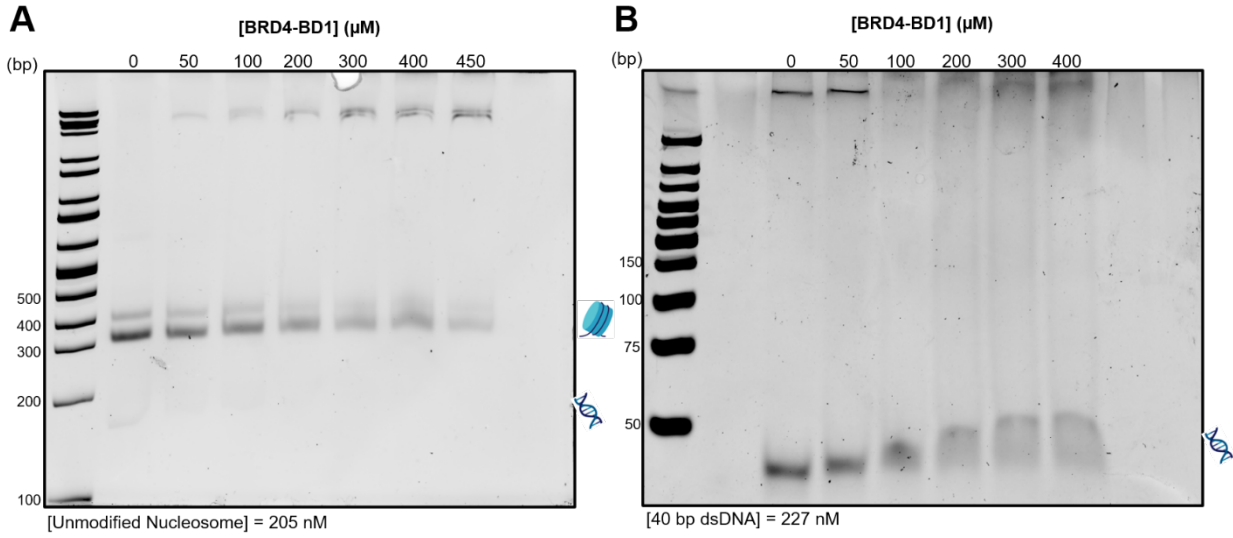

**Figure S16:** EMSA titrations of BRD4-BD1 interacting with (A) unmodified nucleosomes and (B) 40 bp dsDNA.

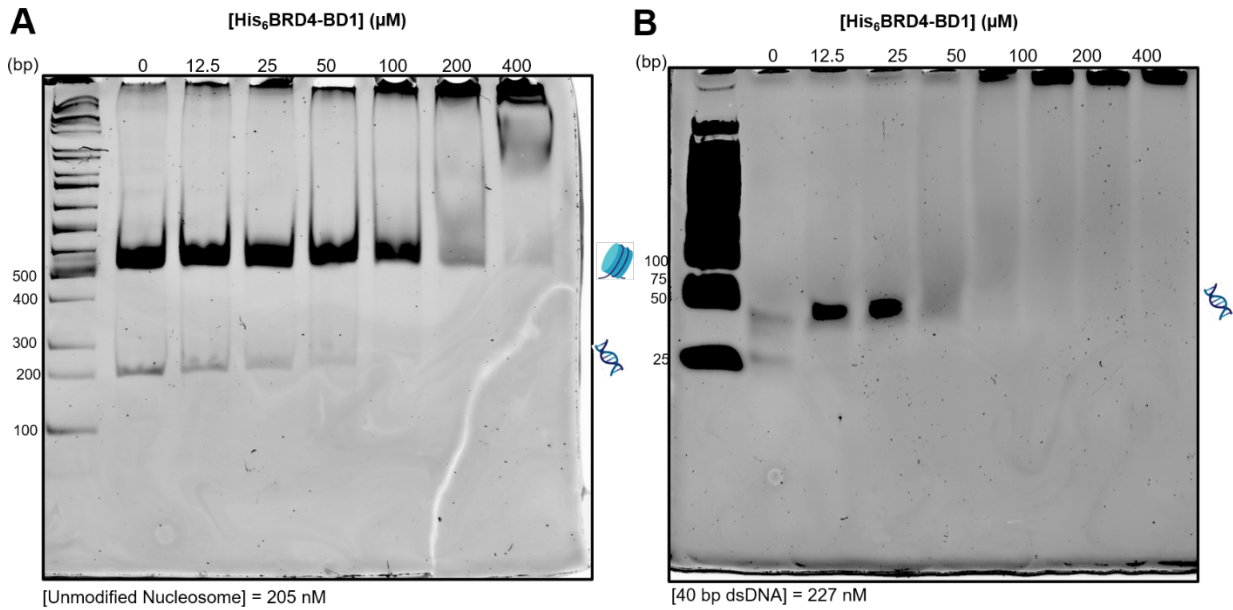

**Figure S17:** EMSA titrations of His<sub>6</sub> BRD4-BD1 interacting with (A) unmodified nucleosomes and (B) 40 bp dsDNA. Here, smearing and consequent shift is evident for both the free nucleosome band and the dsDNA band with increasing protein concentration, supporting a robust protein-DNA

interaction. However, upon the removal of the His<sub>6</sub>-tag, as shown in Figure S16, only a weaker loss in intensity of the free nucleosome or dsDNA band is observed with similar protein concentration. This informs us that the His<sub>6</sub>-tag might be interacting with dsDNA non-specifically to give an apparent higher-affinity to His<sub>6</sub>BRD4-BD1 for both dsDNA and nucleosomes. Thus, the mobility-shift seen with His<sub>6</sub>-tagged protein is only an artifact of the polyhistidine tag as reported by others.<sup>2</sup>

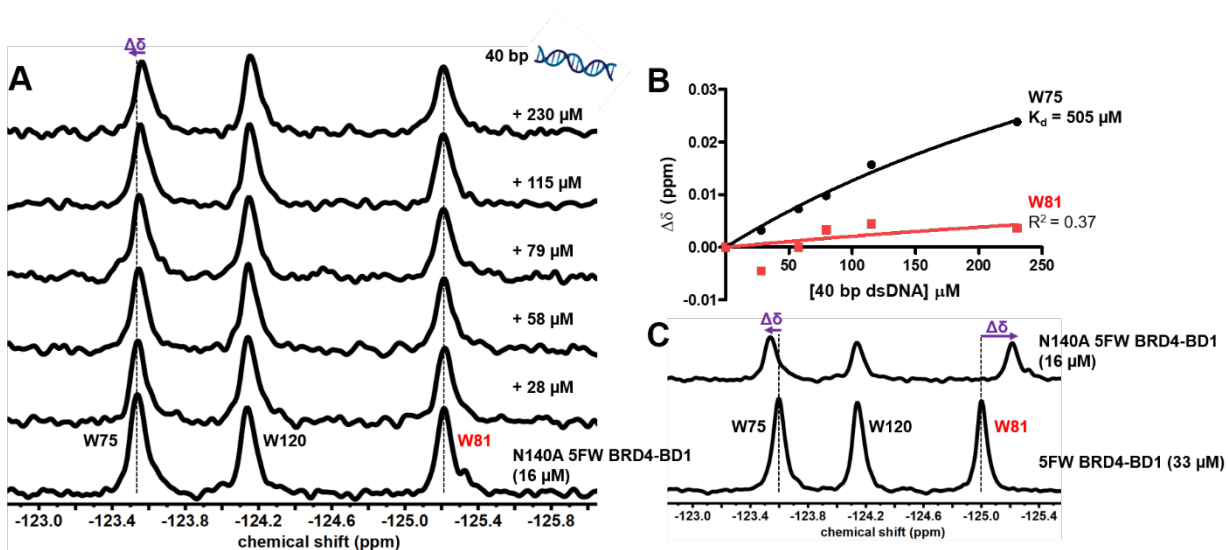

**Figure S18:** PrOF NMR experiments with 40 bp dsDNA binding to N140A 5FW BRD4-BD1. (A) Stacked <sup>19</sup>F NMR spectra and (B) binding isotherm of 40 bp dsDNA (28-230 μM) with 16 μM N140A 5FW BRD4-BD1. Due to poor fitting of the binding isotherm ( $R^2 = 0.37$ ),  $K_d$  could not be determined. (C) Stacked <sup>19</sup>F NMR spectra of N140A and unmutated 5FW BRD4-BD1. W81 is the WPF shelf tryptophan in BD1 of BRD4, colored red. Changes in the chemical shift ( $\Delta\delta$ ) are indicated in purple. W81 moves upfield by 0.21 ppm and W75 moves downfield by 0.06 ppm in N140 5FW BRD4-BD1 when aligned with <sup>19</sup>F NMR spectra of unmutated 5FW BRD4-BD1.

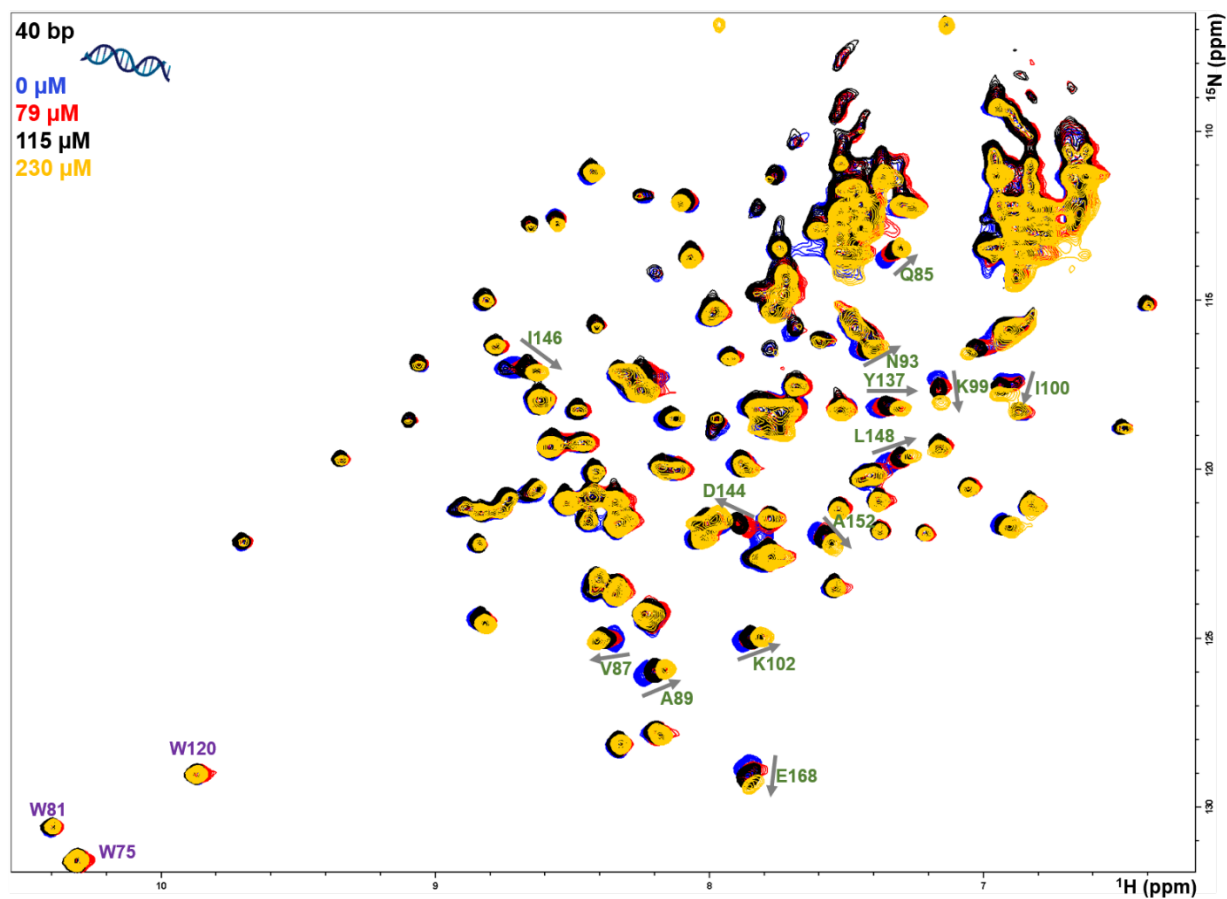

**Figure S19:**  $^1\text{H}$ - $^{15}\text{N}$  HSQC NMR experiments with 40 bp dsDNA binding to 35  $\mu\text{M}$  of  $^{15}\text{N}$  N140A BRD4-BD1. Spectra are color coded according to DNA concentrations as shown in the legend. Titrations were performed at DNA concentrations of 0  $\mu\text{M}$ , 28  $\mu\text{M}$ , 79  $\mu\text{M}$ , 115  $\mu\text{M}$ , and 230  $\mu\text{M}$ . For clarity, only 4 points are displayed, and spectra are color coded accordingly as shown in the legend. Residues that are perturbed greater than the average plus one standard deviation are labelled in green, and the chemical shift perturbation ( $\Delta\delta$ ) is shown in grey.

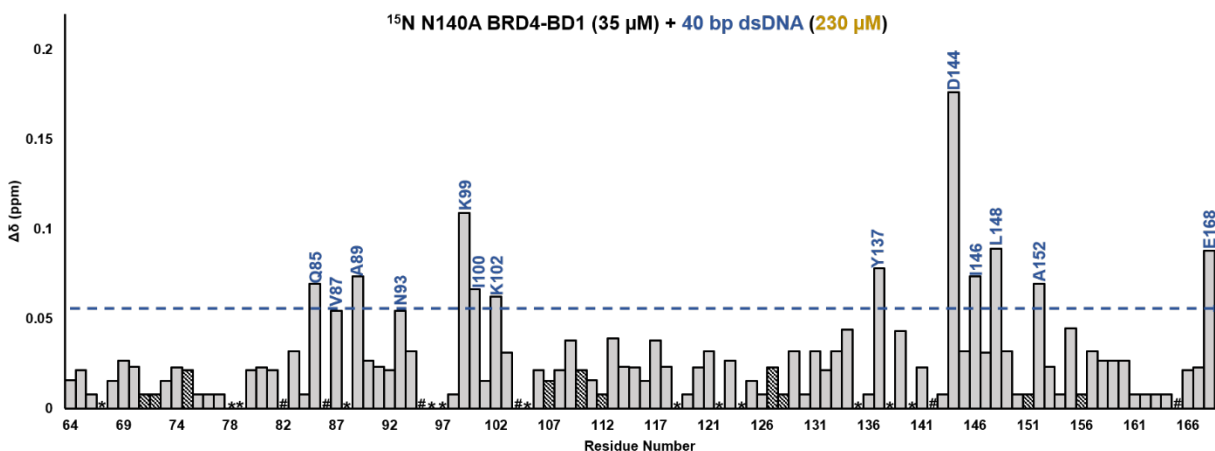

**Figure S20:**  $^1\text{H}$ - $^{15}\text{N}$  HSQC NMR experiment with 40 bp dsDNA binding to  $^{15}\text{N}$  N140 BRD4-BD1. Normalized CSPs are plotted as a function of residue upon titration of 40 bp dsDNA for the DNA concentration of 230  $\mu\text{M}$  and residues that are perturbed greater than the average plus one standard deviation are labeled in blue. A blue dashed line marks this level of significance. Dashed bars indicate a CSP at a lower concentration of DNA (79  $\mu\text{M}$  for W75, M107, D128, and 115  $\mu\text{M}$  for L71, K72, I110, K112, Q127, E151, L156) as the chemical shift at 230  $\mu\text{M}$  could not be assigned. These CSPs were also accounted for average and standard deviation calculations. \* indicates missing resonance and # indicates proline residue.

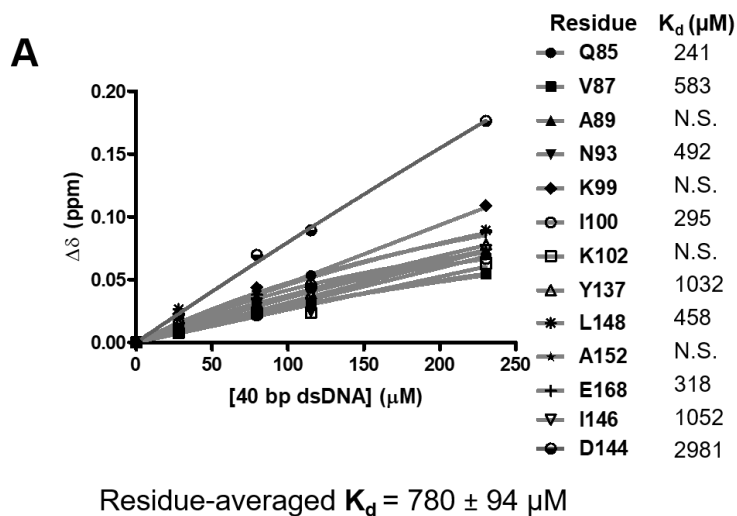

**B**

| Ligand<br>[40 bp dsDNA]<br>$\mu\text{M}$ | Chemical Shift Perturbation ( $\Delta\delta$ ) (ppm) |        |        |        |        |        |        |        |        |        |        |
|------------------------------------------|------------------------------------------------------|--------|--------|--------|--------|--------|--------|--------|--------|--------|--------|
|                                          | Q85                                                  | A89    | N93    | I100   | K102   | Y137   | D144   | I146   | L148   | A152   | E168   |
| 0                                        | 0.0000                                               | 0.0000 | 0.0000 | 0.0000 | 0.0000 | 0.0000 | 0.0000 | 0.0000 | 0.0000 | 0.0000 | 0.0000 |
| 26                                       | 0.0078                                               | 0.0078 | 0.0078 | 0.0216 | 0.0078 | 0.0156 | 0.0156 | 0.0078 | 0.0266 | 0.0078 | 0.0230 |
| 51                                       | 0.0319                                               | 0.0312 | 0.0313 | 0.0216 | 0.0235 | 0.0312 | 0.0697 | 0.0312 | 0.0379 | 0.0234 | 0.0439 |
| 101                                      | 0.0533                                               | 0.0312 | 0.0235 | 0.0459 | 0.0235 | 0.0391 | 0.0892 | 0.0390 | 0.0446 | 0.0318 | 0.0439 |
| 154                                      | 0.0697                                               | 0.0735 | 0.0547 | 0.0666 | 0.0626 | 0.0781 | 0.1764 | 0.0735 | 0.0892 | 0.0697 | 0.0878 |

**Figure S21:** (A) Binding isotherms of  $^1\text{H}$ - $^{15}\text{N}$  HSQC NMR titration of 40 bp dsDNA binding to 35  $\mu\text{M}$  of  $^{15}\text{N}$  N140A BRD4-BD1. (B) Chemical shift perturbations of significant residues to plot residue- averaged  $K_d$ .

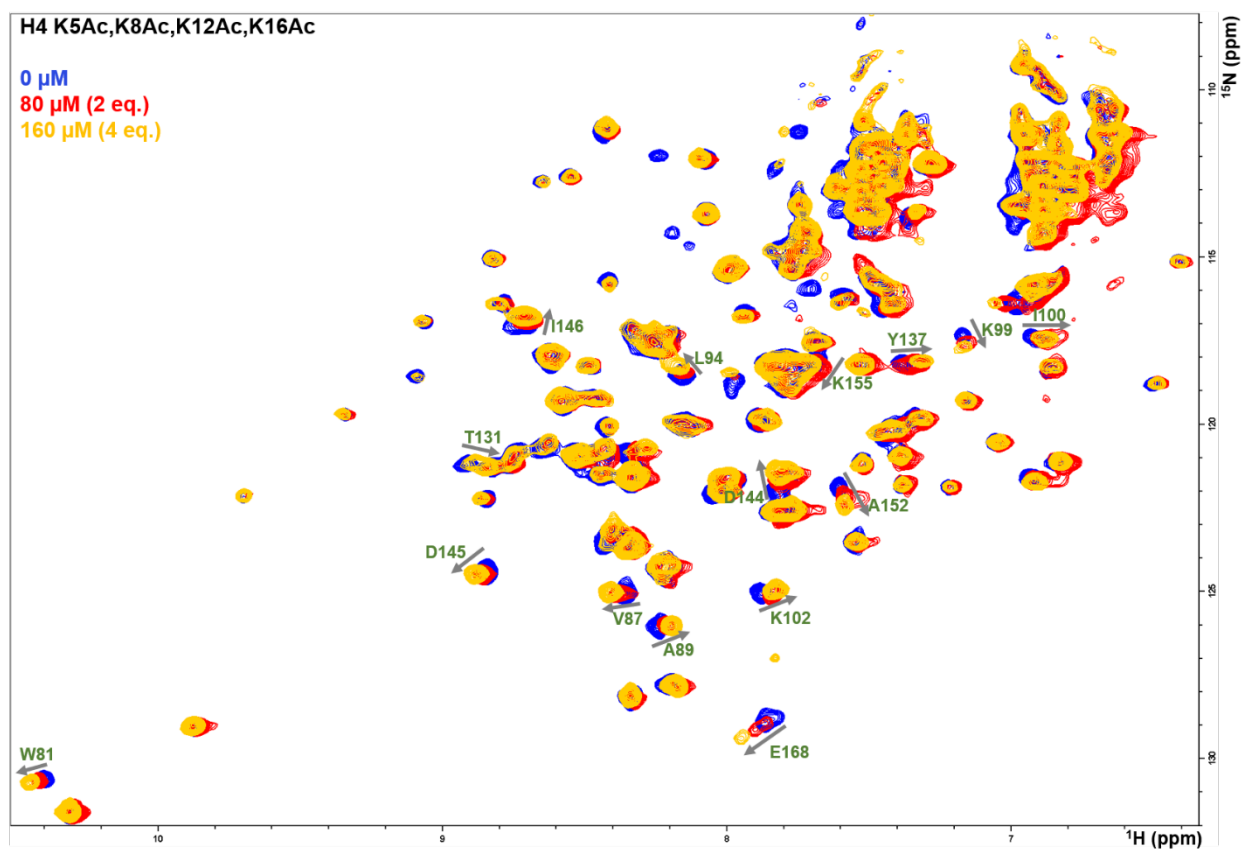

**Figure S22:**  $^1\text{H}$ - $^{15}\text{N}$  HSQC NMR experiments with 40 bp dsDNA binding to 40  $\mu\text{M}$  of  $^{15}\text{N}$  N140A BRD4-BD1. Spectra are color coded according to peptide concentrations as shown in the legend. Titration was performed at peptide concentrations of 0  $\mu\text{M}$ , 80  $\mu\text{M}$ , and 160  $\mu\text{M}$ . Spectra are color coded accordingly as shown in the legend. Residues that are perturbed greater than the average plus one standard deviation are labelled in green, and the chemical shift perturbation ( $\Delta\delta$ ) is shown in grey.

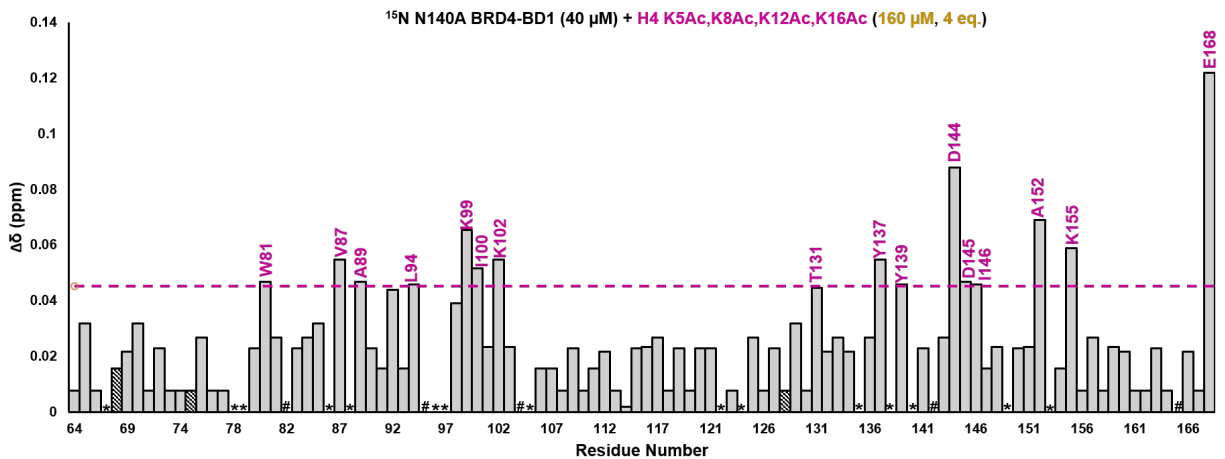

**Figure S23:**  $^1\text{H}$ - $^{15}\text{N}$  HSQC NMR experiments with H4 K5Ac, K8Ac, K12Ac, K16Ac binding to 40  $\mu\text{M}$  of  $^{15}\text{N}$  N140A BRD4-BD1. Normalized CSPs are plotted as a function of residue upon titration H4 K5Ac, K8Ac, K12Ac, K16Ac for the peptide concentration of 160  $\mu\text{M}$  (4 eq.). Residues that are perturbed greater than the average plus one standard deviation are labeled in pink. A pink line marks this level of significance. Dashed bars (R68, W75 indole side-chain NH resonance, D128) indicate CSPs at 80  $\mu\text{M}$  (2 eq.) of peptide concentration as the chemical shift at 188  $\mu\text{M}$  could not be assigned. \* indicates missing resonance and # indicates proline residue.

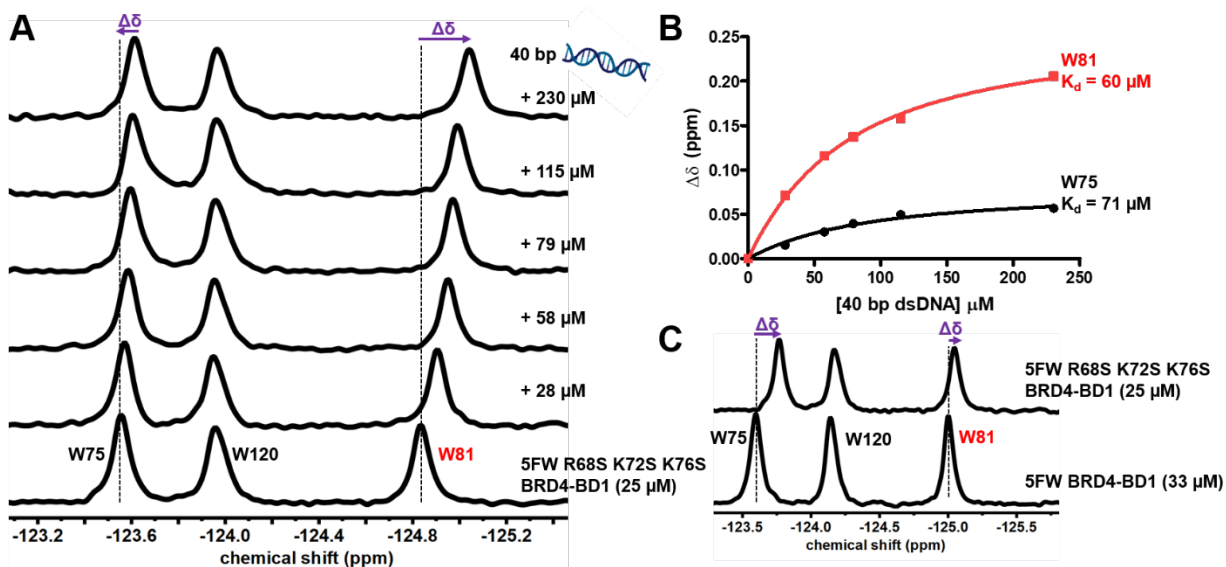

**Figure S24:** PrOF NMR experiments with 40 bp dsDNA binding to 5FW R68S K72S K76S BRD4-BD1. (A) Stacked  $^{19}\text{F}$  NMR spectra and (B) Binding isotherm of 40 bp dsDNA (28-230  $\mu\text{M}$ ) with 25  $\mu\text{M}$  5FW R68S K72S K76S BRD4-BD1. (C) Stacked  $^{19}\text{F}$  NMR spectra of R68S K72S K76S and unmutated 5FW BRD4-BD1. W81 is the WPF shelf tryptophan in BD1 of BRD4, colored red. The change in the chemical shift ( $\Delta\delta$ ) is shown in purple and is indicated by the dashed line. W81 and W75 move upfield by 0.04 ppm and 0.17 ppm respectively, in 5FW R68S K72S K76S BRD4-BD1, when aligned with  $^{19}\text{F}$  NMR spectra of unmutated 5FW BRD4-BD1.



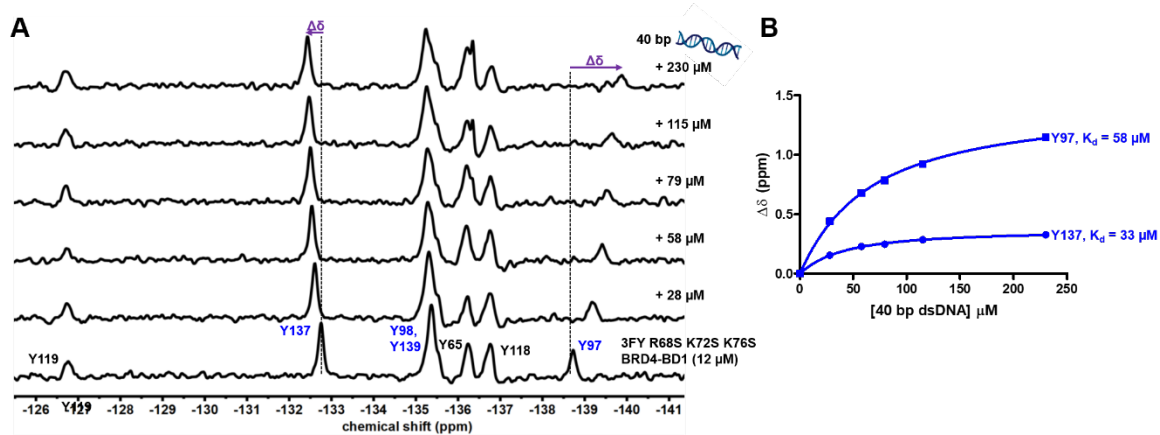

**Figure S25:** PrOF NMR experiments with 40 bp dsDNA binding to 3FY R68S K72S K76S BRD4-BD1. (A) Stacked  $^{19}\text{F}$  NMR spectra and (B) Binding isotherm of 40 bp dsDNA (28-230  $\mu\text{M}$ ) with 12  $\mu\text{M}$  3FY R68S K72 SK76S BRD4-BD1. Y97, Y98, Y137, and Y139 are around the KAc-binding site in BD1 of BRD4, colored blue. Y65, Y118, and Y119 are shown in black. The change in the chemical shift ( $\Delta\delta$ ) is shown in purple and is indicated by the dashed line.

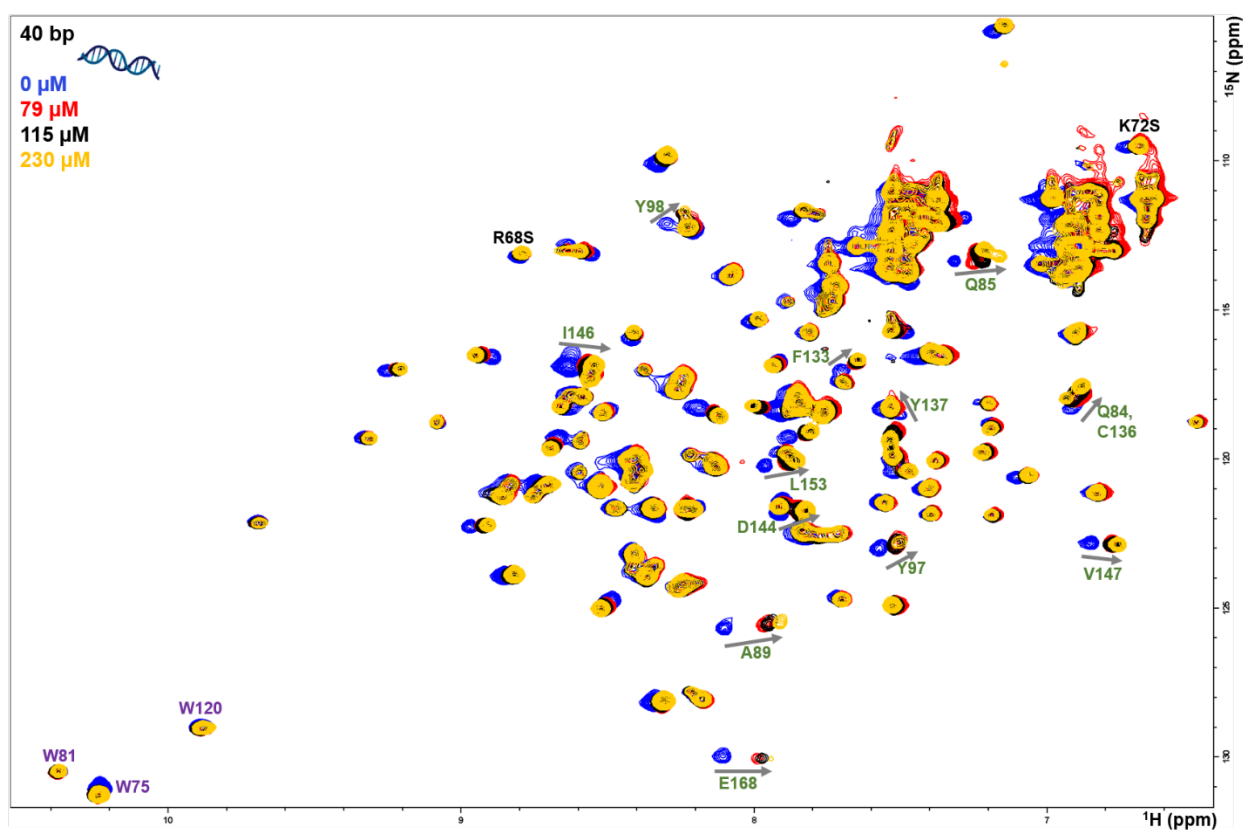

**Figure S26:**  $^1\text{H}$ - $^{15}\text{N}$  HSQC NMR experiments with 40 bp dsDNA binding to 40  $\mu\text{M}$  of  $^{15}\text{N}$  **R68S K72S K76S BRD4-BD1**. Spectra are color coded according to DNA concentrations as shown in the legend. Titrations were performed at DNA concentrations of 0  $\mu\text{M}$ , 28  $\mu\text{M}$ , 58  $\mu\text{M}$ , 79  $\mu\text{M}$ , 115  $\mu\text{M}$ , and 230  $\mu\text{M}$ . For clarity, only 4 points are displayed, and spectra are color coded accordingly as shown in the legend. Residues that are perturbed greater than the average plus one standard deviation are labelled in green, and the chemical shift perturbation ( $\Delta\delta$ ) is shown in grey. Cross-peaks from the indole NH of tryptophan sidechains are shown in purple. Mutated residues R68S and K72S are labeled in black.

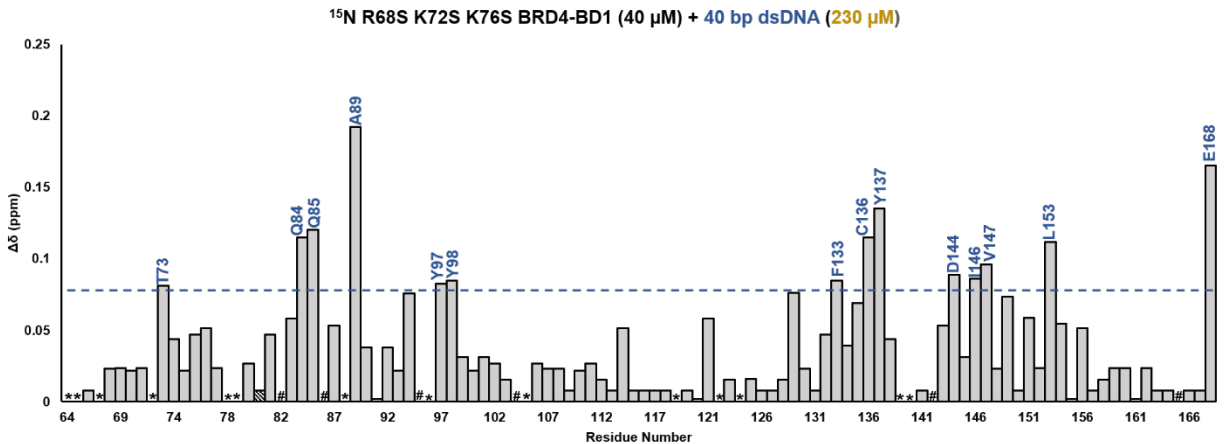

**Figure S27:**  $^1\text{H}$ - $^{15}\text{N}$  HSQC NMR experiment with 40 bp dsDNA binding to  $^{15}\text{N}$  **R68S K72S K76S BRD4-BD1**. Normalized CSPs are plotted as a function of residue upon titration of 40 bp dsDNA for the DNA concentration of 230  $\mu\text{M}$  and residues that are perturbed greater than the average plus one standard deviation are labeled in blue. A blue dashed line marks this level of significance. Dashed bar indicates the CSP of W81 indole side-chain NH resonance at 115  $\mu\text{M}$  of DNA as the chemical shift at 230  $\mu\text{M}$  could not be assigned. This CSP was also accounted for average and standard deviation calculations. \* indicates missing resonance and # indicates proline residue.

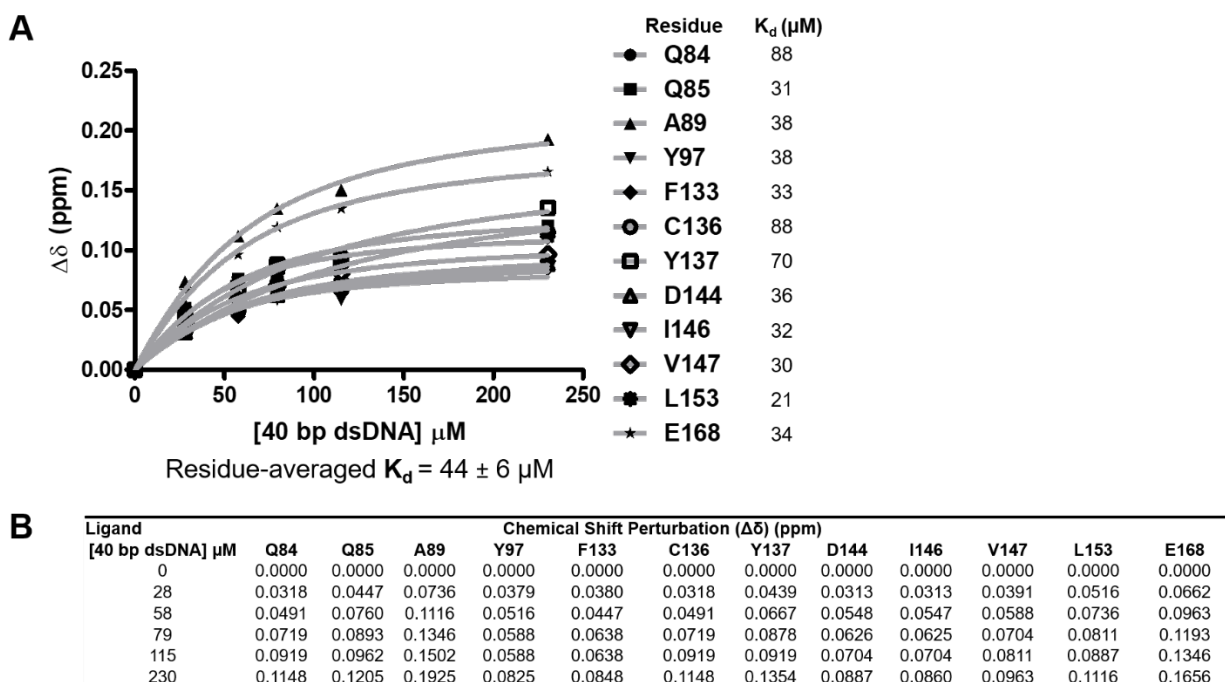

**Figure S28:** (A) Binding isotherms of  $^1\text{H}$ - $^{15}\text{N}$  HSQC NMR titration of 40 bp dsDNA binding to 40  $\mu\text{M}$  of  $^{15}\text{N}$  R68S K72S K76S BRD4-BD1. (B) Chemical shift perturbations of significant residues to plot residue- averaged  $K_d$ .

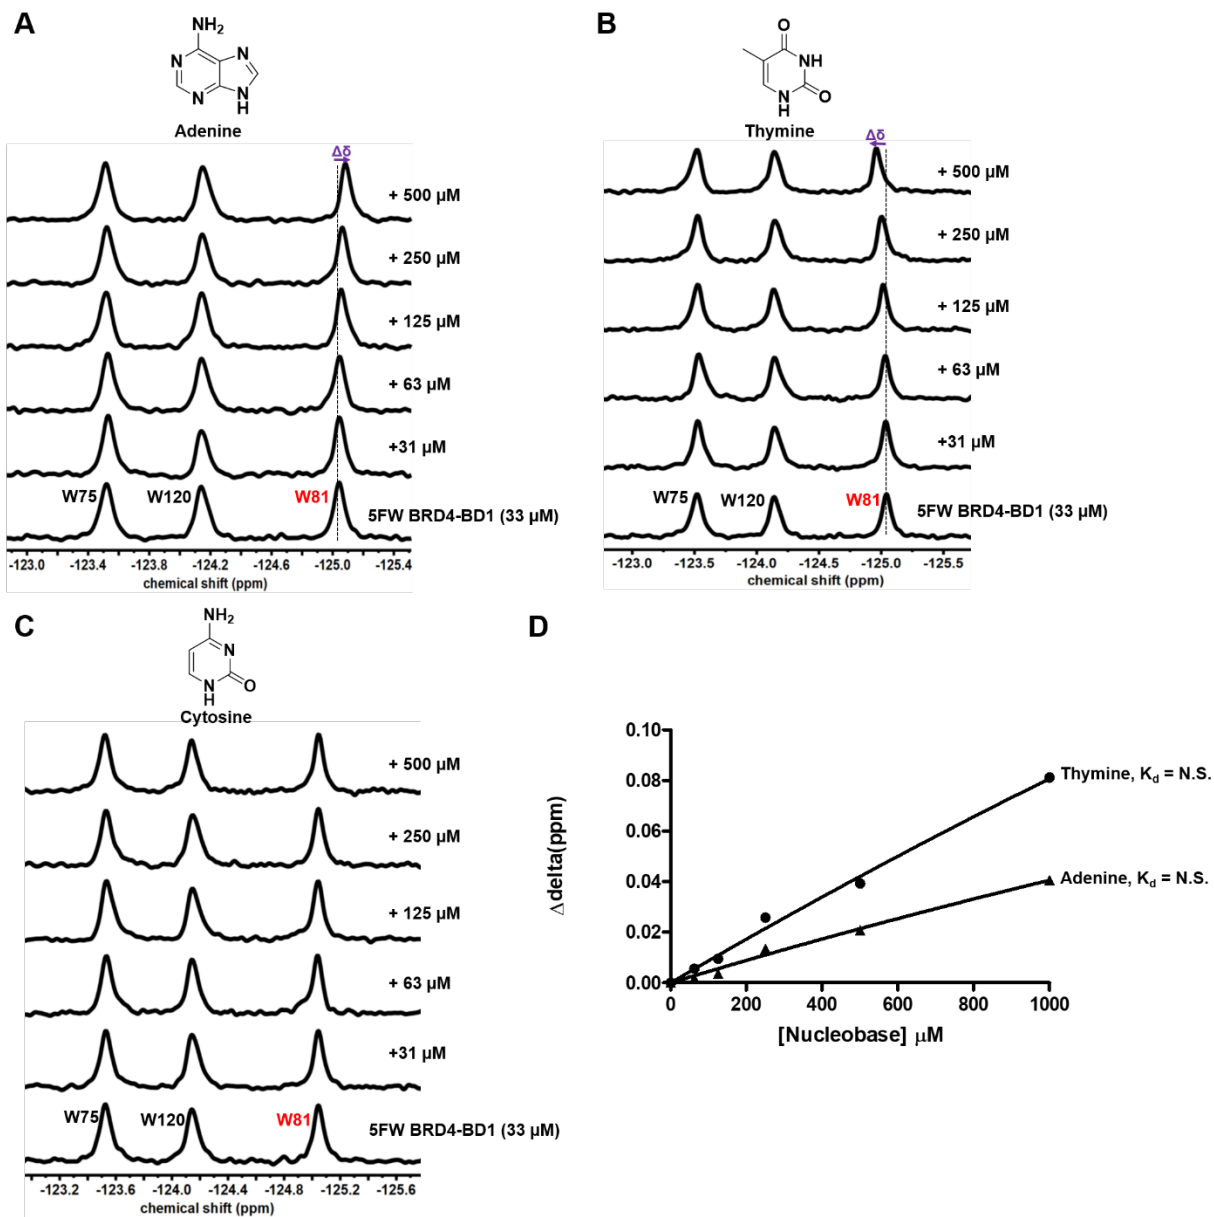

**Figure S29:** PrOF NMR experiments with nucleobases binding to 5FW BRD4-BD1. Stacked  $^{19}\text{F}$  NMR spectra of (A) adenine (B) thymine (C) cytosine and (D) Binding isotherm of thymine and adenine with  $33\ \mu\text{M}$  5FW BRD4-BD1. W81 is the WPF shelf tryptophan in BD1 of BRD4, colored red. The change in the chemical shift ( $\Delta\delta$ ) is shown in purple and is indicated by the dashed line.

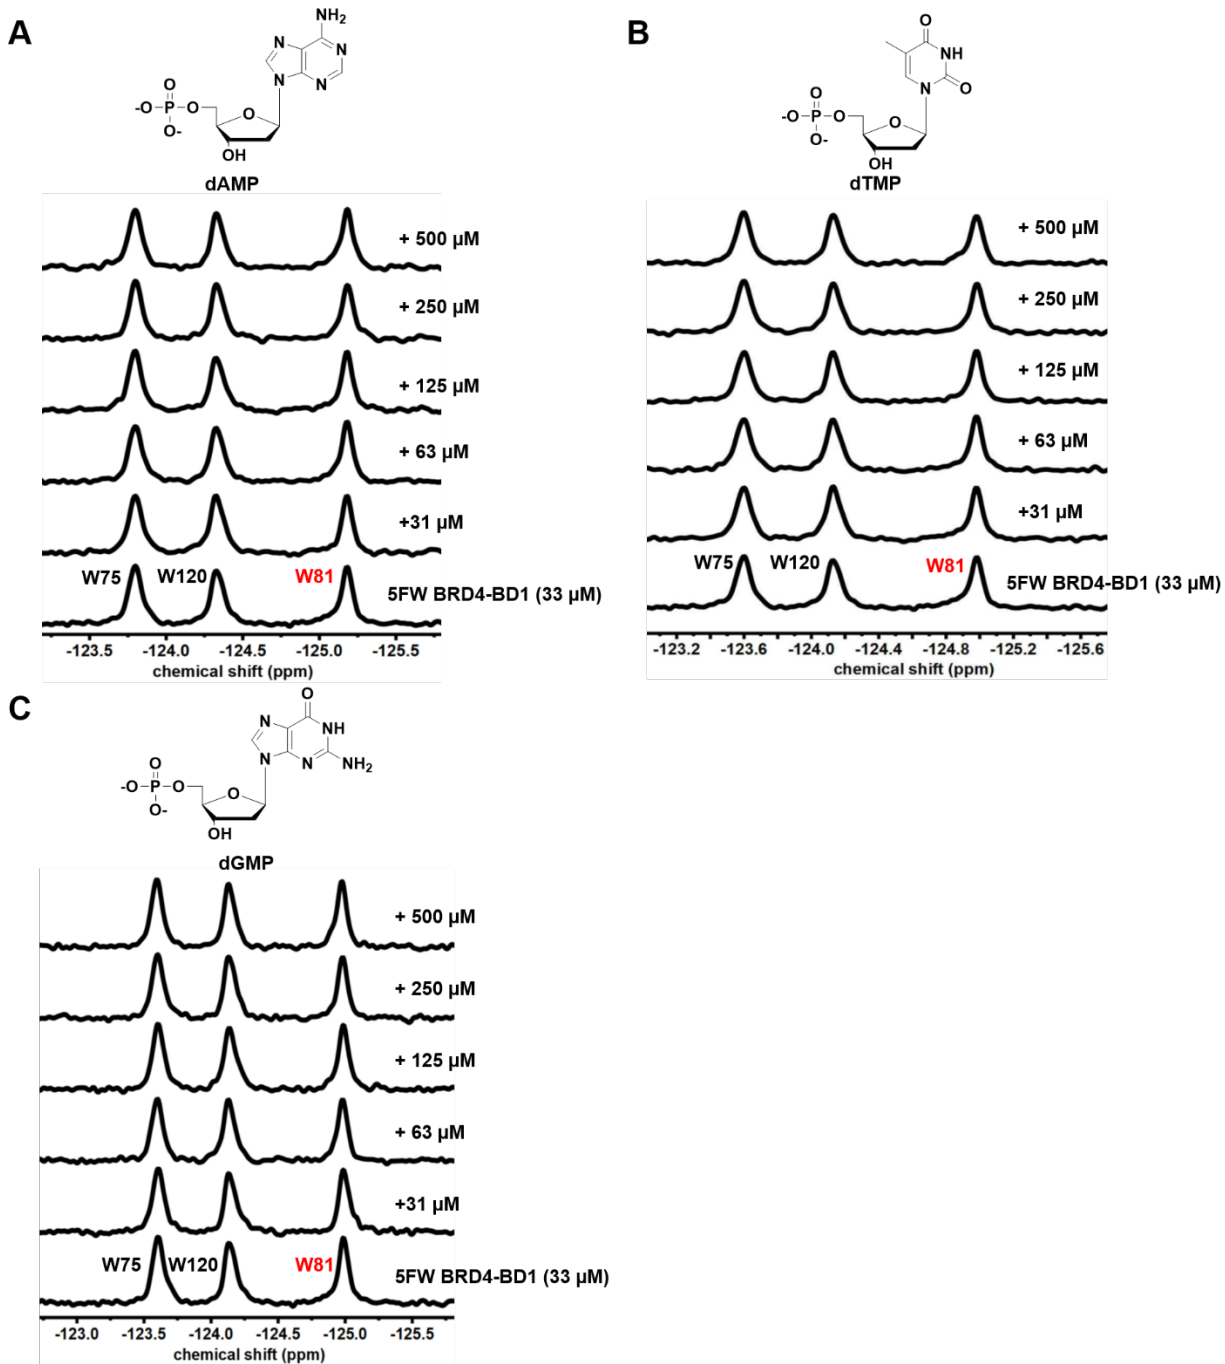

**Figure S30:** PrOF NMR experiments with deoxyribonucleotides binding to 5FW BRD4-BD1. Stacked  $^{19}\text{F}$  NMR spectra of (A) dAMP (B) dTMP and (C) dGMP with 33  $\mu\text{M}$  5FW BRD4-BD1. W81 is the WPF shelf tryptophan in BD1 of BRD4, colored red.

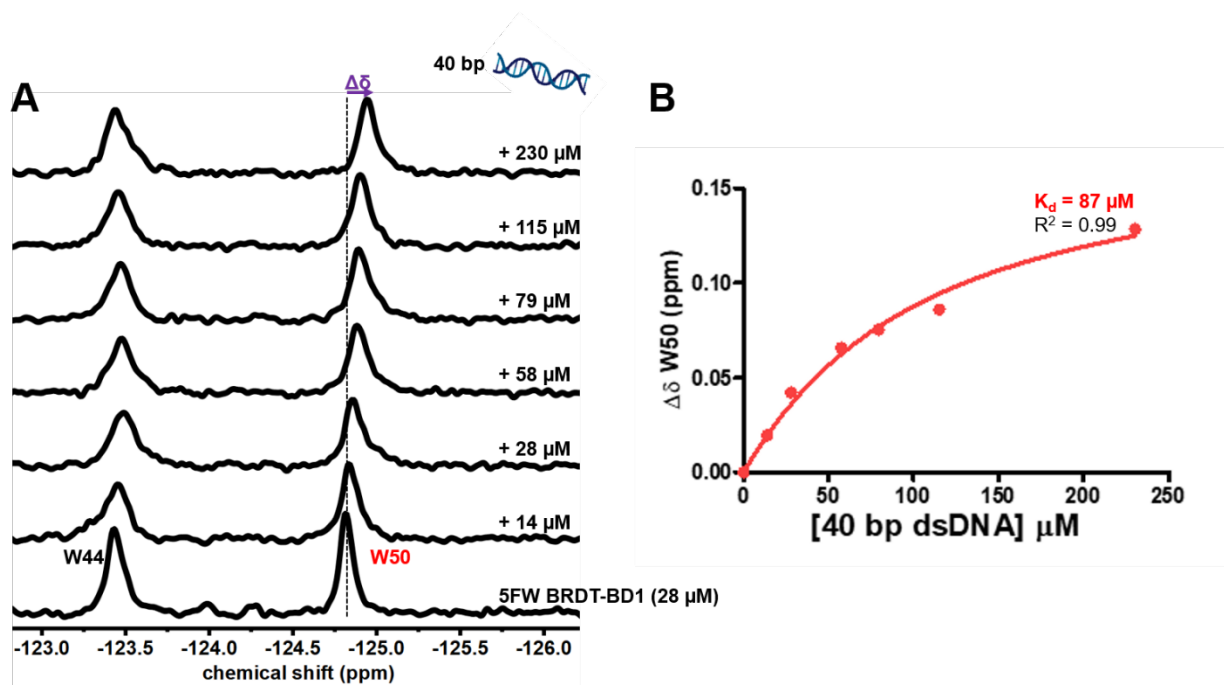

**Figure S31:** PrOF NMR experiments with 40 bp dsDNA binding to 5FW BRDT-BD1. (A) Stacked  $^{19}\text{F}$  NMR spectra and (B) Binding isotherm of 40 bp dsDNA (28-230  $\mu\text{M}$ ) with 28  $\mu\text{M}$  5FW BRDT-BD1. W50 is the WPF shelf tryptophan in BD1 of BRDT, colored red. The change in the chemical shift ( $\Delta\delta$ ) is shown in purple and is indicated by the dashed line.

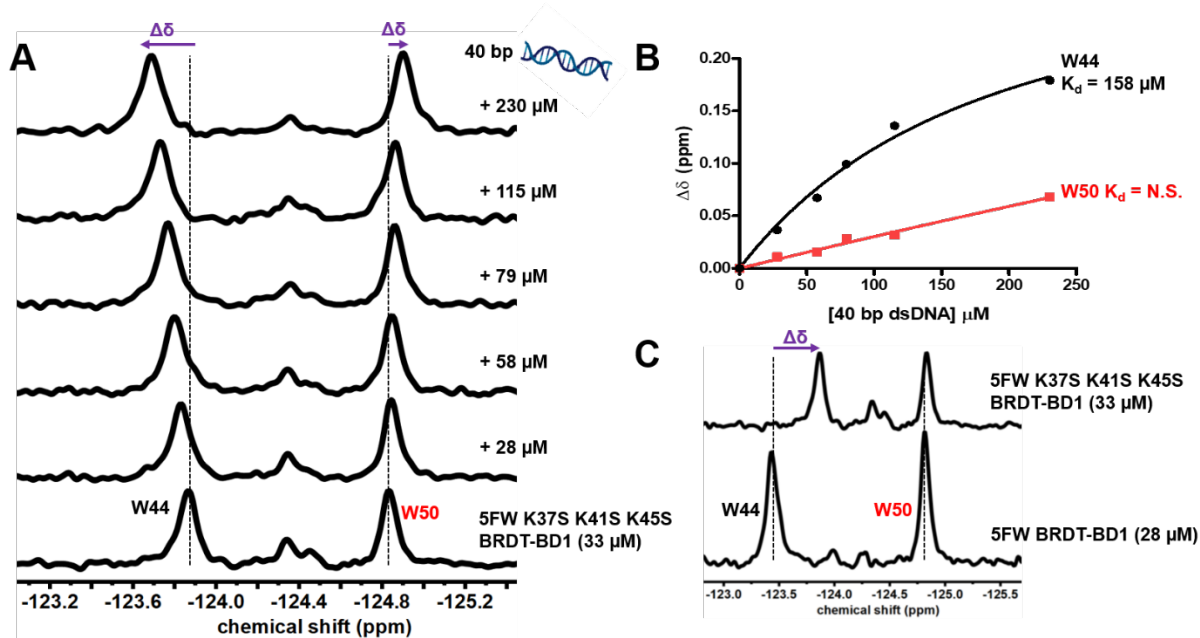

**Figure S32:** PrOF NMR experiments with 40 bp dsDNA binding to 5FW K37S K41S K45S BRDT-BD1. (A) Stacked  $^{19}\text{F}$  NMR spectra and (B) binding isotherm of 40 bp dsDNA (28-230  $\mu\text{M}$ ) with 33  $\mu\text{M}$  5FW K37S K41S K45S BRDT-BD1. (C) Stacked  $^{19}\text{F}$  NMR spectra of 5FW K37S K41S K45S and unmutated BRDT-BD1. W50 is the WPF shelf tryptophan in BD1 of BRDT, colored red. The change in the chemical shift ( $\Delta\delta$ ) is shown in purple and is indicated by the dashed line. W44 moves upfield by 0.44 ppm in 5FW K37S K41S K45S BRDT-BD1 when aligned with  $^{19}\text{F}$  NMR spectra of unmutated 5FW BRDT-BD1.



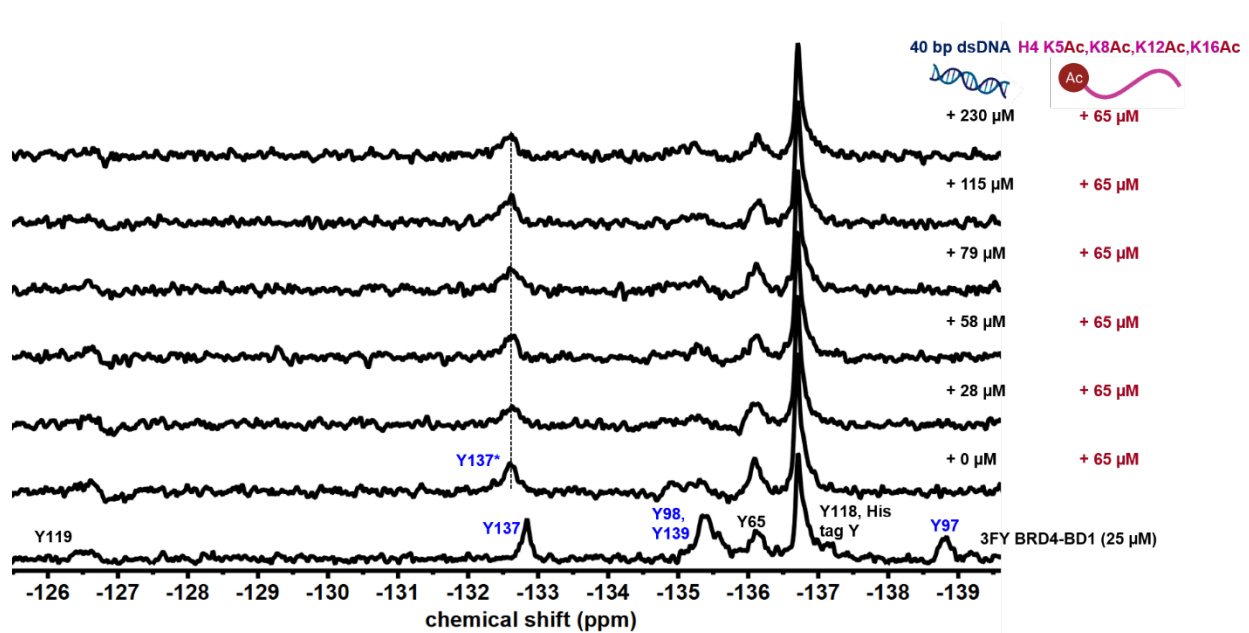

**Figure S33:** PrOF NMR experiments with 40 bp dsDNA (14-230 μM) binding to 25 μM 3FY BRD4-BD1 pre-bound to 65 μM H4 K5Ac,K8Ac,K12Ac,K16Ac. Y97, Y98, Y137, and Y139 are around the KAc-binding site in BD1 of BRD4, colored blue. Y65, Y118, and Y119 are shown in black. The dashed line indicates minimal CSP (0.03 ppm) of Y137. <sup>19</sup>F resonance for the ligand-bound protein is indicated with an asterisk.

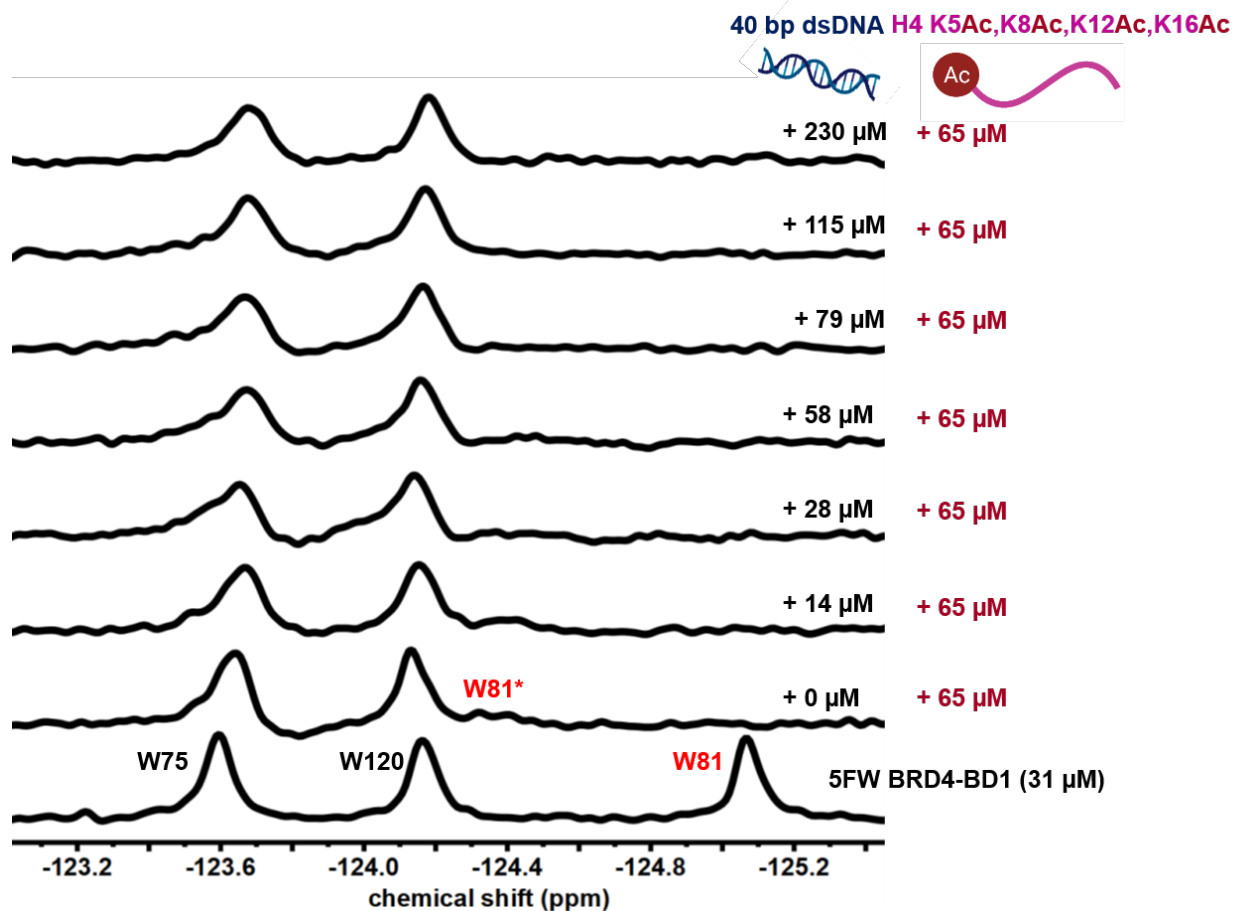

**Figure S34:** PrOF NMR experiments with 40 bp dsDNA (14-230  $\mu\text{M}$ ) binding to 31  $\mu\text{M}$  5FW BRD4-BD1 pre-bound to 65  $\mu\text{M}$  H4 K5Ac, K8Ac, K12Ac, K16Ac. W81 is the WPF shelf tryptophan in BD1 of BRD4, colored red.  $^{19}\text{F}$  resonance for the ligand-bound protein is indicated with an asterisk.

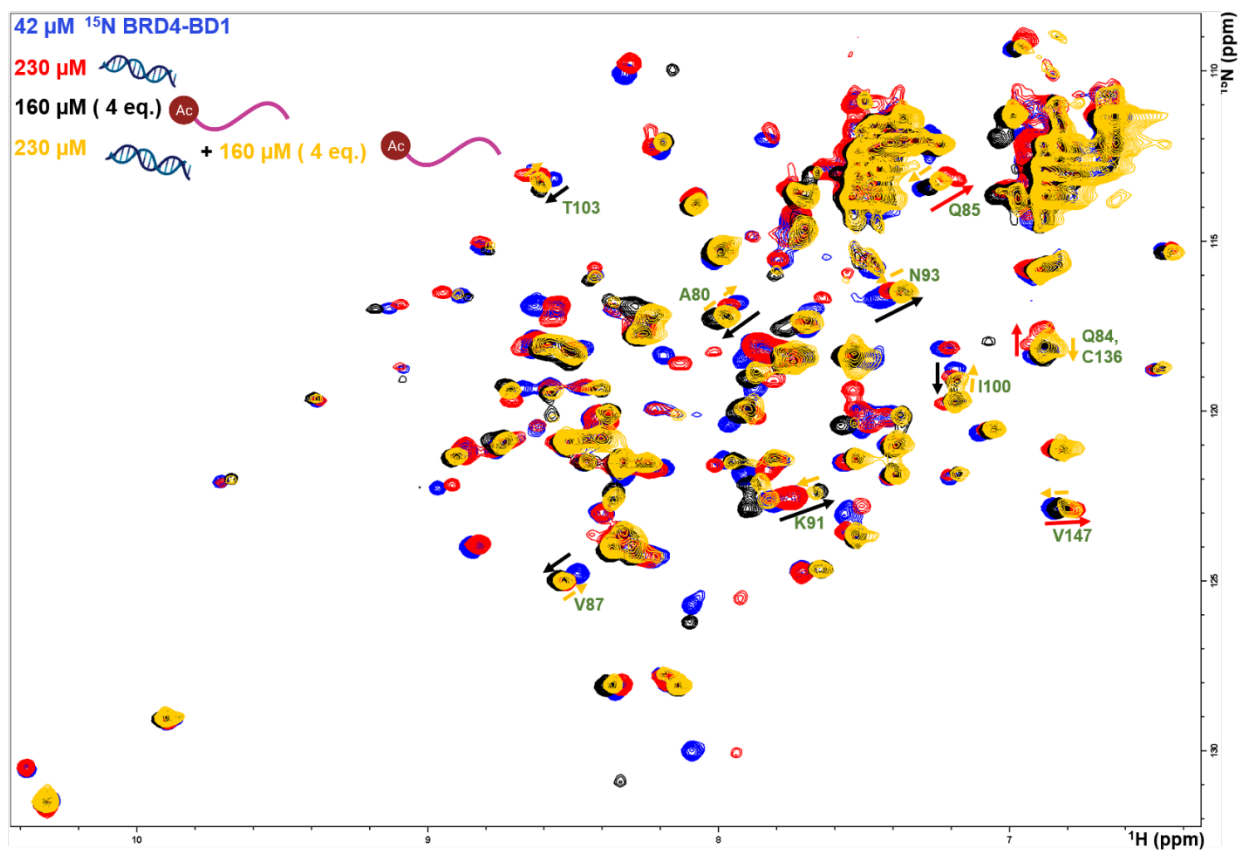

**Figure S35:** Overlay of  $^1\text{H}$ - $^{15}\text{N}$  HSQC NMR spectra of 42  $\mu\text{M}$  of  $^{15}\text{N}$  BRD4-BD1 (blue) and in the presence of 230  $\mu\text{M}$  40 bp dsDNA (red), 160  $\mu\text{M}$  H4 K5Ac,K8Ac,K12Ac,K16Ac (black), or both 230  $\mu\text{M}$  40 bp dsDNA and 160  $\mu\text{M}$  H4 K5Ac,K8Ac,K12Ac,K16Ac (yellow). Arrows trace the linear trajectory between apo and peptide-bound BRD4-BD1 (black) or apo and DNA-bound BRD4-BD1 (red) and upon titration of dsDNA into peptide-bound BRD4-BD1 (yellow) and vice versa.

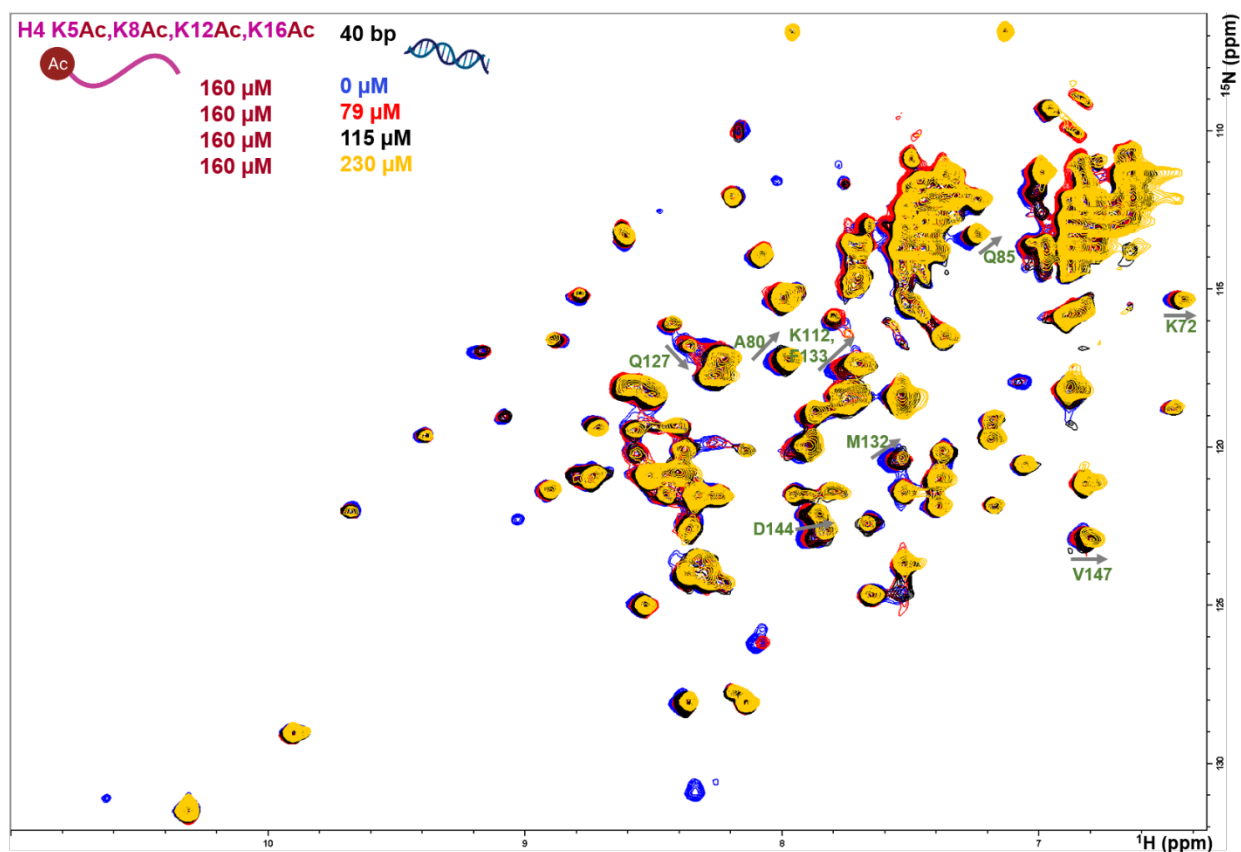

**Figure S36:**  $^1\text{H}$ - $^{15}\text{N}$  HSQC NMR experiments with 40 bp dsDNA binding to 42  $\mu\text{M}$  of  $^{15}\text{N}$  BRD4-BD1 pre-bound to 160  $\mu\text{M}$  H4 K5Ac,K8Ac,K12Ac,K16Ac. Spectra are color coded according to DNA concentrations as shown in the legend. Titrations were performed at DNA concentrations of 0  $\mu\text{M}$ , 28  $\mu\text{M}$ , 58  $\mu\text{M}$ , 79  $\mu\text{M}$ , 115  $\mu\text{M}$ , and 230  $\mu\text{M}$ . For clarity, only 4 points are displayed, and spectra are color coded accordingly as shown in the legend. Residues that are perturbed greater than the average plus one standard deviation are labelled in green, and the chemical shift perturbation ( $\Delta\delta$ ) is shown in grey.

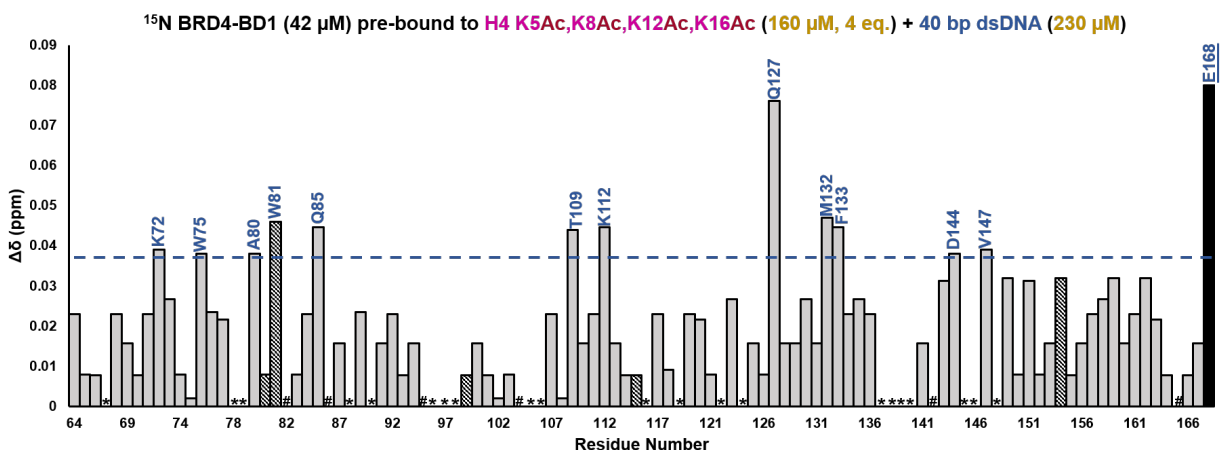

**Figure S37:**  $^1\text{H}$ - $^{15}\text{N}$  HSQC NMR experiment with 40 bp dsDNA binding to 42  $\mu\text{M}$  of  $^{15}\text{N}$  **BRD4-BD1** pre-bound to 160  $\mu\text{M}$  H4 K5Ac,K8Ac,K12Ac,K16Ac. Normalized CSPs are plotted as a function of residue upon titration of 40 bp dsDNA for the DNA concentration of 230  $\mu\text{M}$  and residues that are perturbed greater than the average plus one standard deviation are labeled in blue. A blue dashed line marks this level of significance. Dashed bars indicate a CSP at a different concentration of DNA (79  $\mu\text{M}$  for W81 amide NH resonance and 115  $\mu\text{M}$  for W81 indole side-chain NH resonance, K99, E154) as the chemical shift at 230  $\mu\text{M}$  could not be assigned. These CSPs were also accounted for average and standard deviation calculations. E168 broadened to baseline in the DNA-bound state and is arbitrarily assigned a CSP of 0.08 ppm and is indicated by a black bar.\* indicates missing resonance and # indicates proline residue.

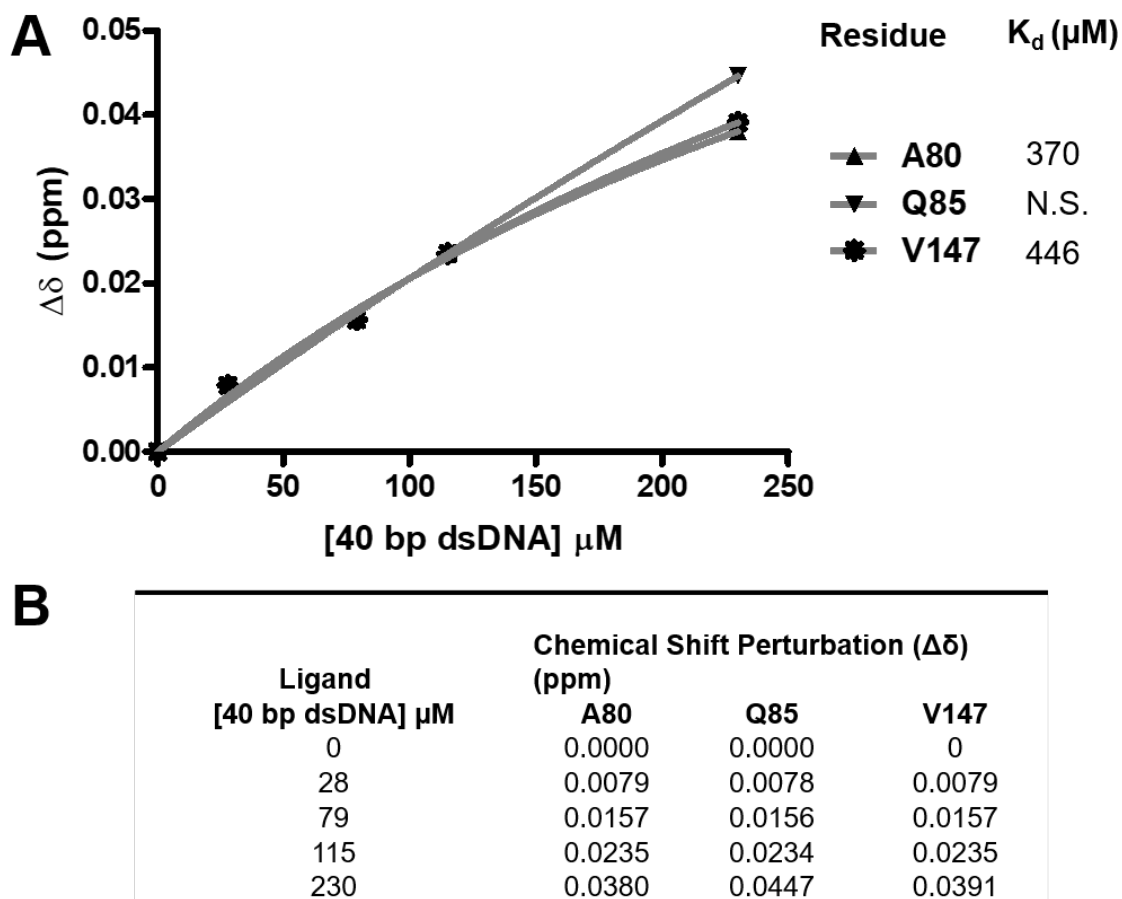

**Figure S38:** (A) Binding isotherms of  $^1\text{H}$ - $^{15}\text{N}$  HSQC NMR titration of 40 bp dsDNA binding to 42  $\mu\text{M}$  of  $^{15}\text{N}$  BRD4-BD1 pre-bound to 160  $\mu\text{M}$  H4 K5Ac,K8Ac,K12Ac,K16Ac. (B) Chemical shift perturbations of significant residues to plot  $K_d$  values. Only residues giving  $R^2 \geq 0.99$  are shown.

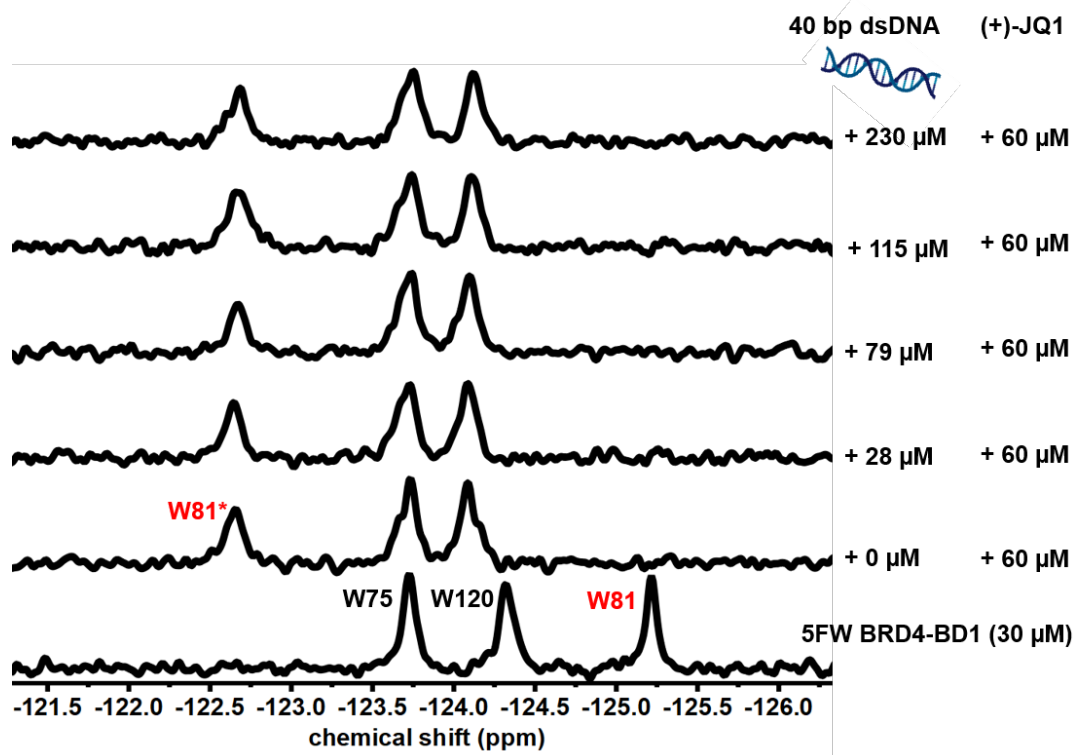

**Figure S39:** ProOF NMR experiments with 40 bp dsDNA (14-230  $\mu\text{M}$ ) binding to 31  $\mu\text{M}$  5FW BRD4-BD1 pre-bound to 65  $\mu\text{M}$  H4 K5Ac,K8Ac,K12Ac,K16Ac. W81 is the WPF shelf tryptophan in BD1 of BRD4, colored red.  $^{19}\text{F}$  resonance for the ligand-bound protein is indicated with an asterisk.

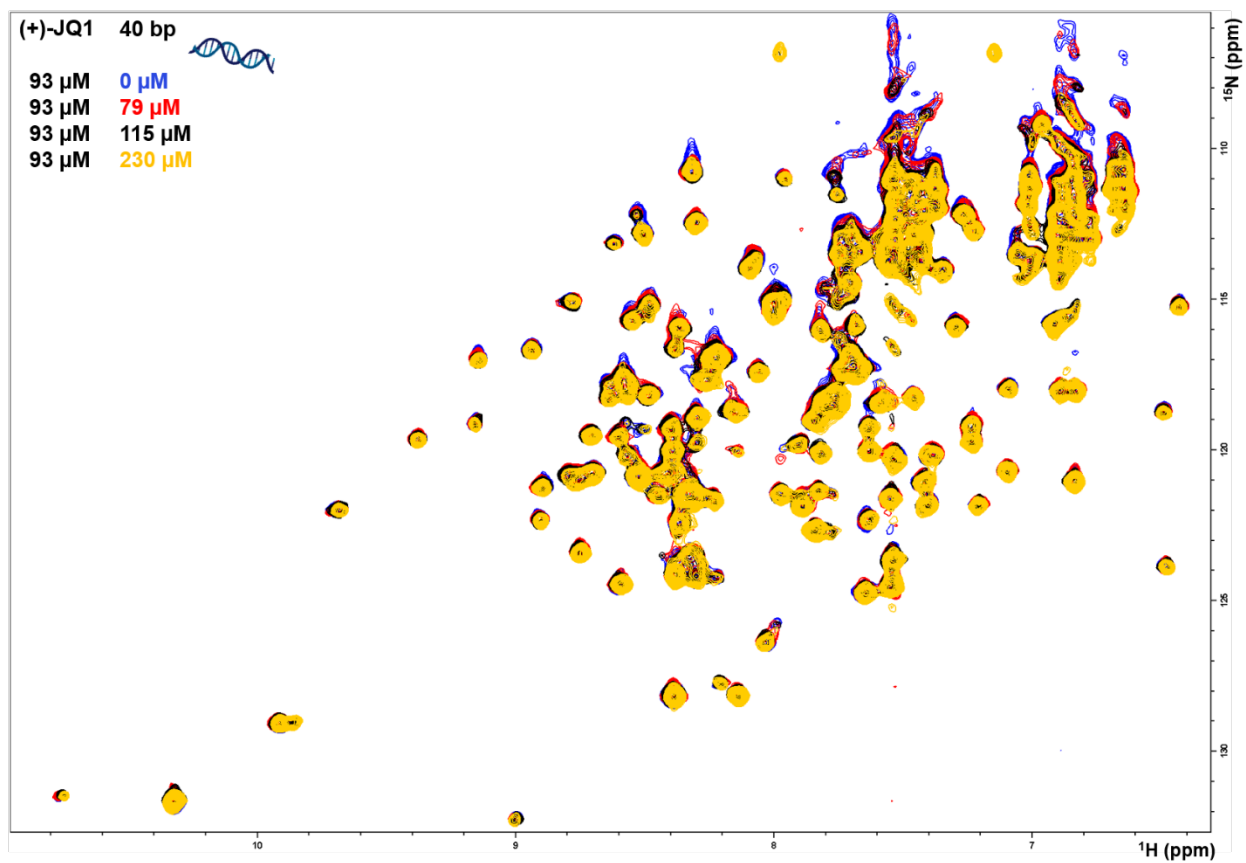

**Figure S40:**  $^1\text{H}$ - $^{15}\text{N}$  HSQC NMR experiments with 40 bp dsDNA binding to 42  $\mu\text{M}$  of  $^{15}\text{N}$  **BRD4-BD1** pre-bound to 93  $\mu\text{M}$  (+)-JQ1. Spectra are color coded according to DNA concentrations as shown in the legend. Titrations were performed at DNA concentrations of 0  $\mu\text{M}$ , 28  $\mu\text{M}$ , 58  $\mu\text{M}$ , 79  $\mu\text{M}$ , 115  $\mu\text{M}$ , and 230  $\mu\text{M}$ . For clarity, only 4 points are displayed, and spectra are color coded accordingly as shown in the legend.



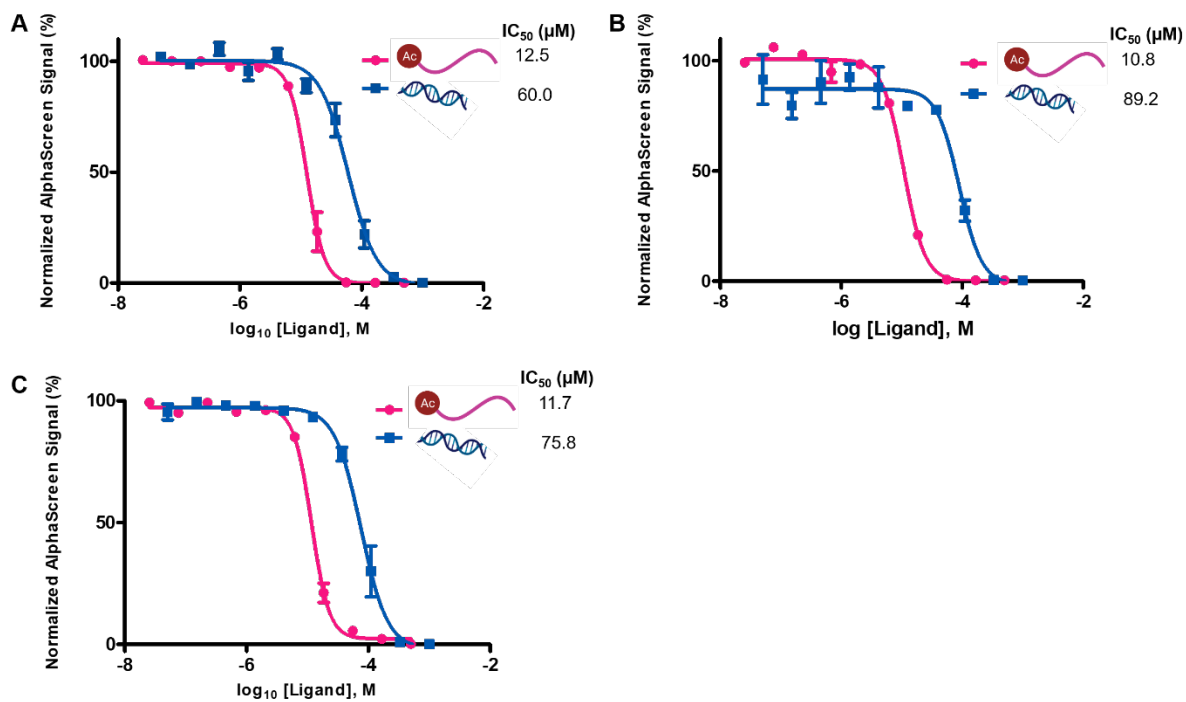

**Figure S41:** AlphaScreen competition experiments with 9xHis-BRD4-BD1 using a biotinylated histone peptide, reported as mean  $\pm$  SD of three experimental replicates (A, B, C) performed in duplicate giving an average IC<sub>50</sub> of  $75 \pm 12$   $\mu$ M.

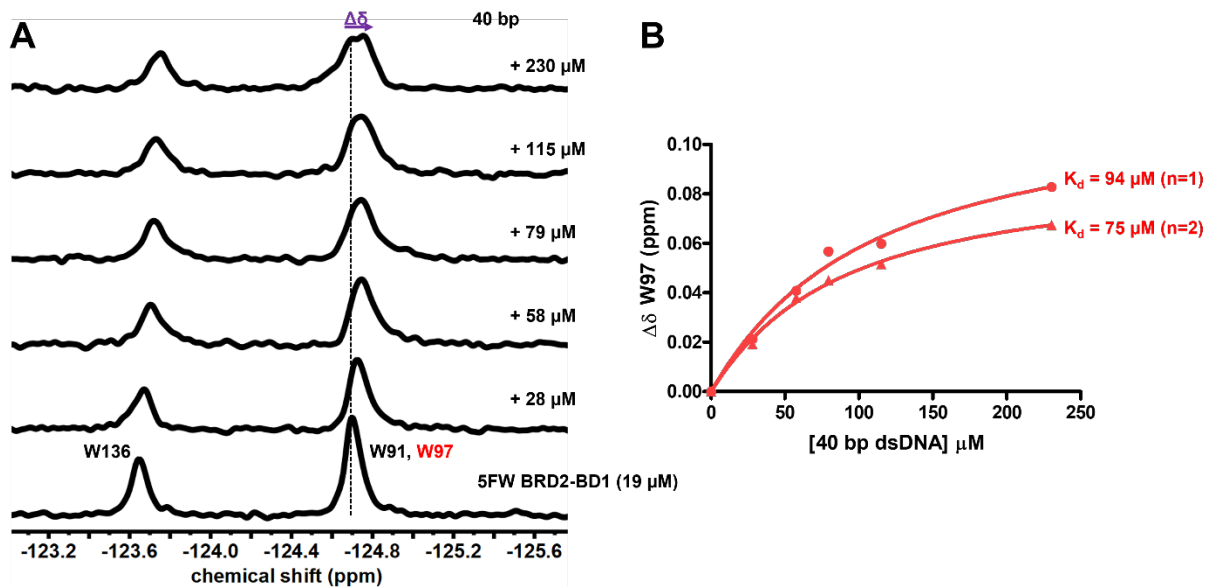

**Figure S42:** PrOF NMR experiments with 40 bp dsDNA binding to 5FW BRD2-BD1. (A) Stacked  $^{19}\text{F}$  NMR spectra and (B) Binding isotherms of 40 bp dsDNA (28-230  $\mu\text{M}$ ) with 19  $\mu\text{M}$  5FW BRD2-BD1. W91 is the WPF shelf tryptophan in BD1 of BRD2, colored red.<sup>3</sup> The change in the chemical shift ( $\Delta\delta$ ) is shown in purple and is indicated by the dashed line.

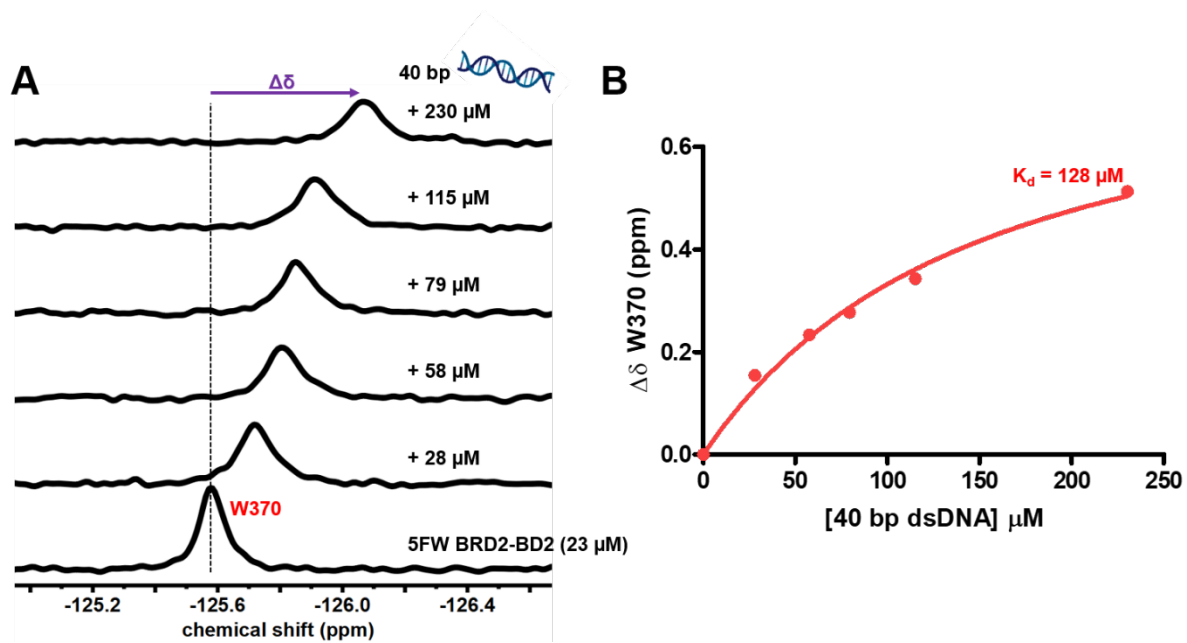

**Figure S43:** PrOF NMR experiments with 40 bp dsDNA binding to 5FW BRD2-BD2. (A) Stacked  $^{19}\text{F}$  NMR spectra and (B) Binding isotherm of 40 bp dsDNA (28-230  $\mu\text{M}$ ) with 23  $\mu\text{M}$  5FW BRD2-BD2. W370 is the WPF shelf tryptophan in BD2 of BRD2, colored red.<sup>3</sup> The change in the chemical shift ( $\Delta\delta$ ) is shown in purple and is indicated by the dashed line.

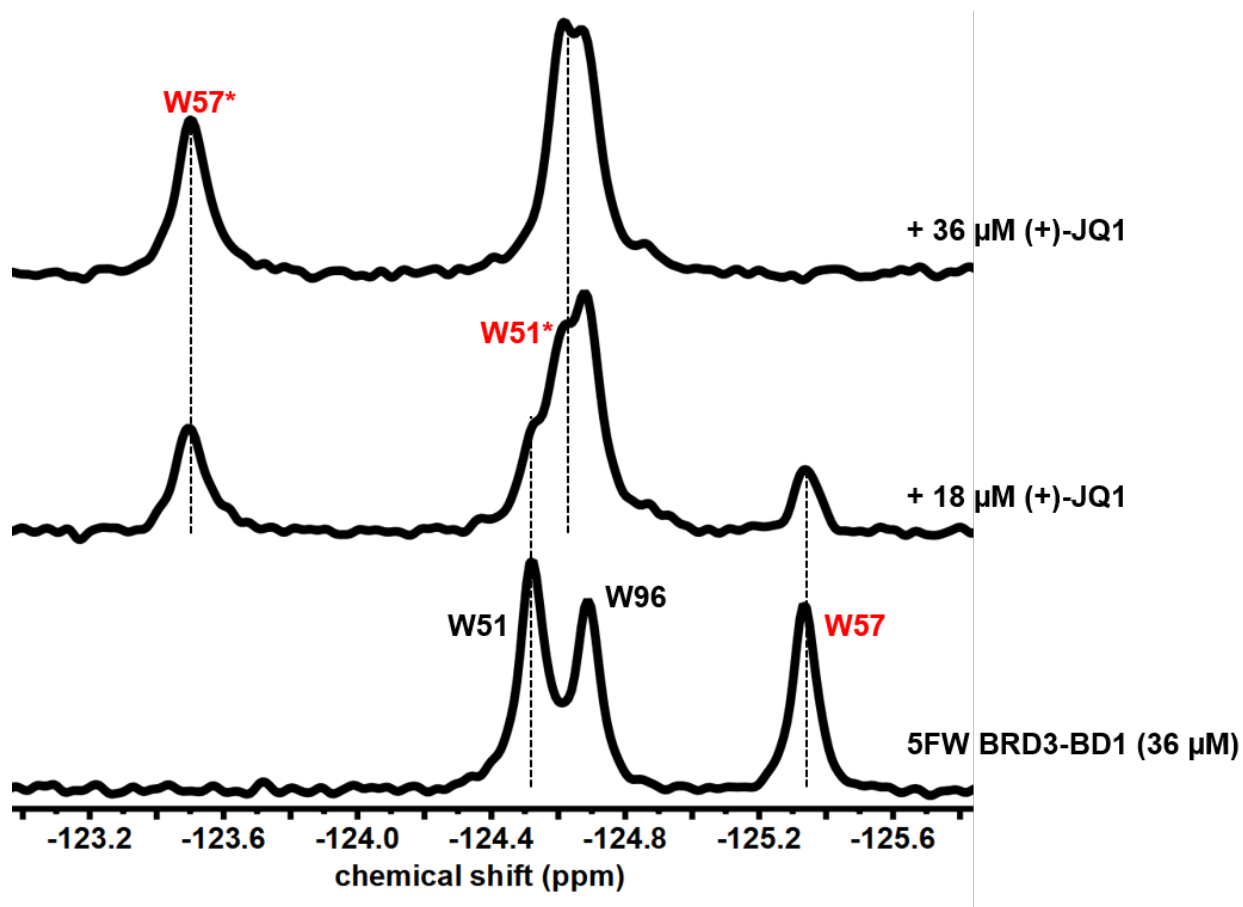

**Figure S44:** PrOF NMR experiment of 5FW BRD3-BD1 with (+)-JQ1 to assign <sup>19</sup>F resonances. W57 is the WPF shelf tryptophan in BD2 of BRD2, colored red. Dashed line indicates change in the appearance of a resonance due to interaction of the protein with (+)-JQ1.

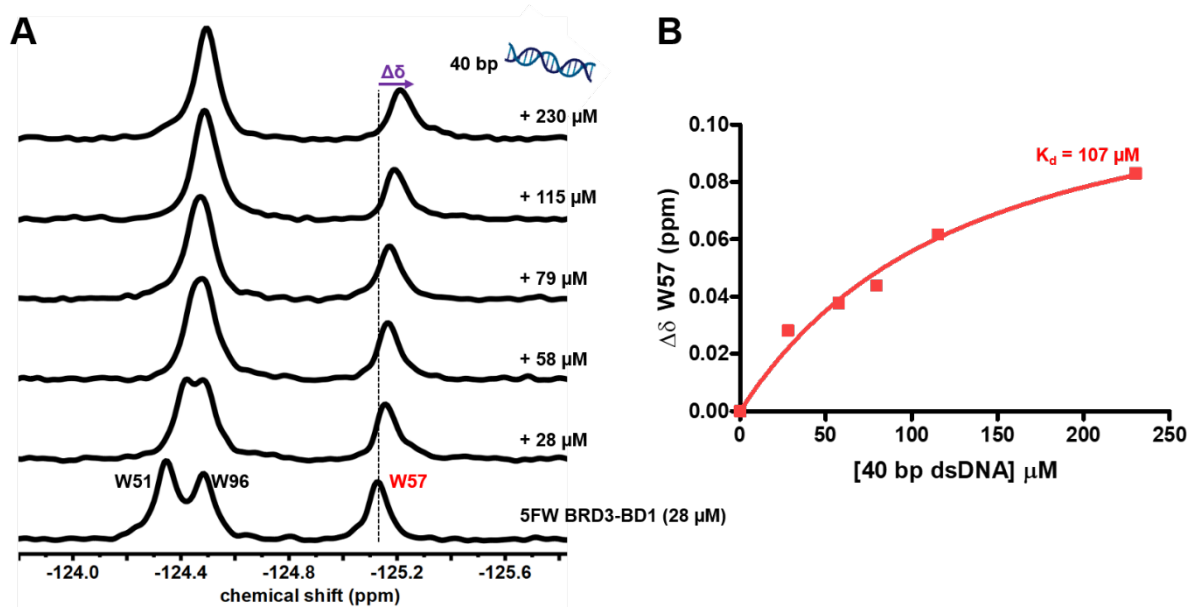

**Figure S45:** PrOF NMR experiments with 40 bp dsDNA binding to 5FW BRD3-BD1. (A) Stacked  $^{19}\text{F}$  NMR spectra and (B) Binding isotherm of 40 bp dsDNA (28-230  $\mu\text{M}$ ) with 28  $\mu\text{M}$  5FW BRD3-BD1. W57 is the WPF shelf tryptophan in BD1 of BRD3, colored red. The change in the chemical shift ( $\Delta\delta$ ) is shown in purple and is indicated by the dashed line.

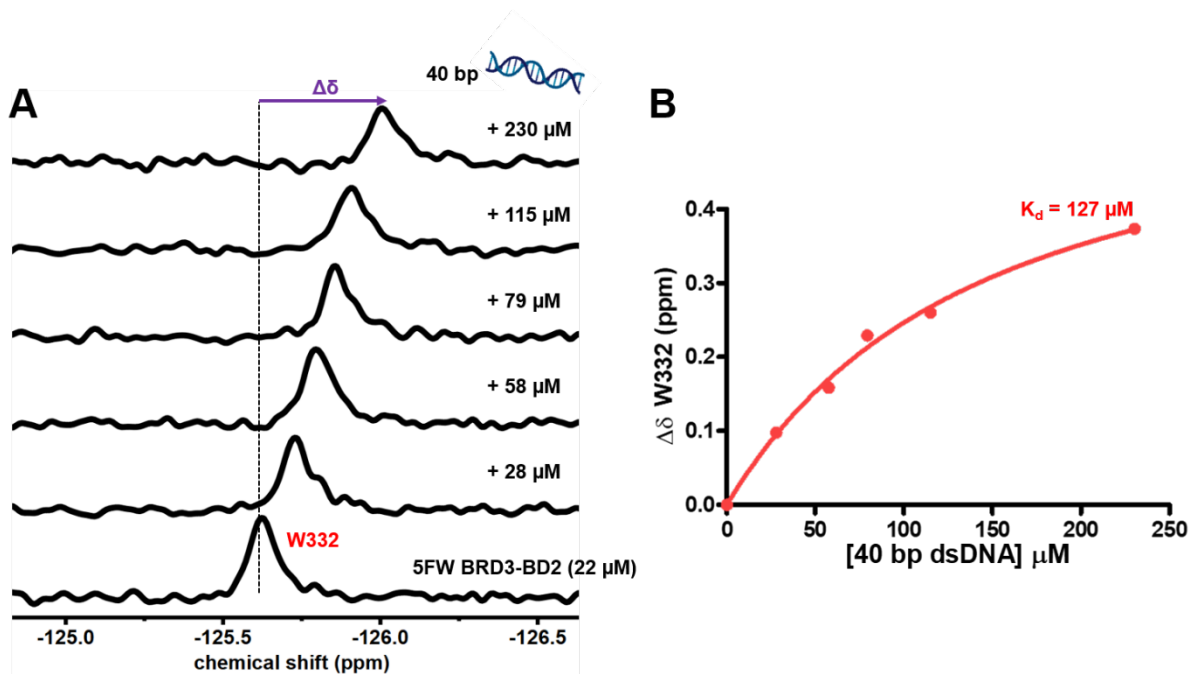

**Figure S46:** PrOF NMR experiments with 40 bp dsDNA binding to 5FW BRD3-BD2. (A) Stacked  $^{19}\text{F}$  NMR spectra and (B) Binding isotherm of 40 bp dsDNA (28-230  $\mu\text{M}$ ) with 22  $\mu\text{M}$  5FW BRD3-BD1. W332 is the WPF shelf tryptophan in BD2 of BRD3, colored red. The change in the chemical shift ( $\Delta\delta$ ) is shown in purple and is indicated by the dashed line.

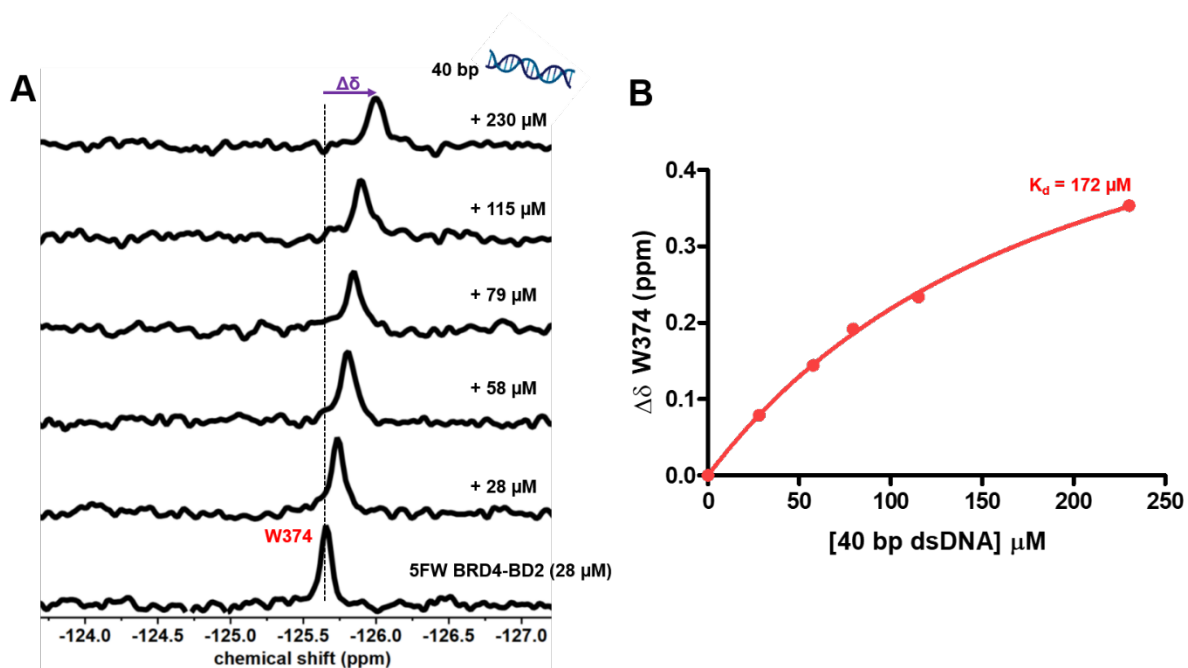

**Figure S47:** PrOF NMR experiments with 40 bp dsDNA binding to 5FW BRD4-BD2. (A) Stacked  $^{19}\text{F}$  NMR spectra and (B) Binding isotherm of 40 bp dsDNA (28-230  $\mu\text{M}$ ) with 28  $\mu\text{M}$  5FW BRD4-BD2. W374 is the WPF shelf tryptophan in BD2 of BRD4, colored red. The change in the chemical shift ( $\Delta\delta$ ) is shown in purple and is indicated by the dashed line.

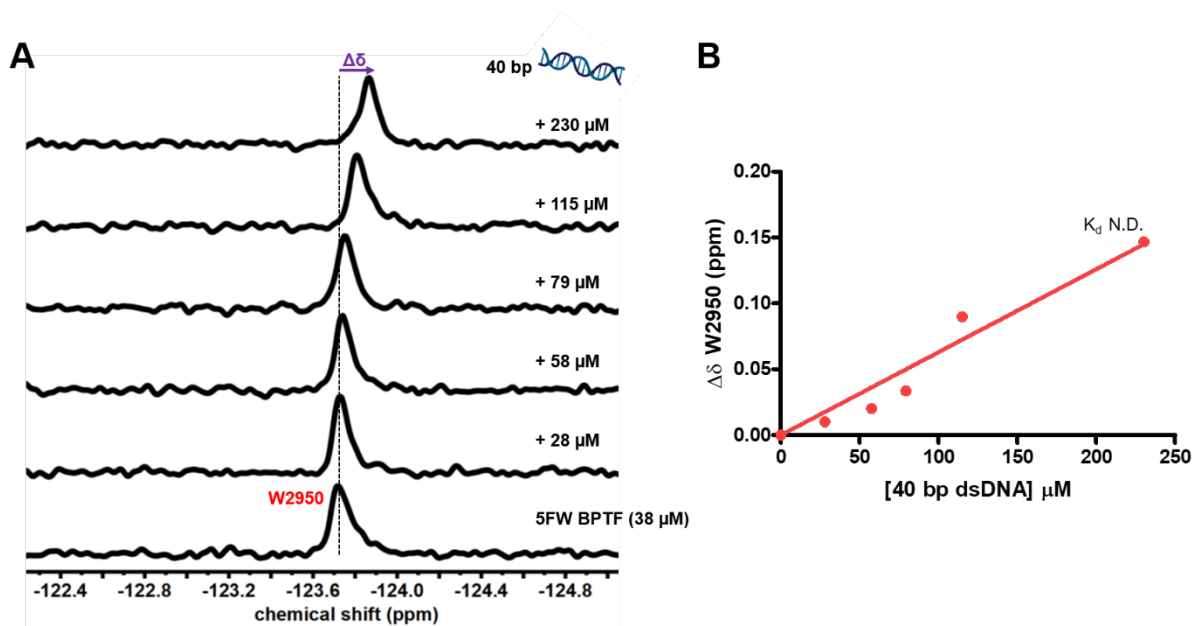

**Figure S48:** PrOF NMR experiments with 40 bp dsDNA binding to 5FW BPTF. (A) Stacked  $^{19}\text{F}$  NMR spectra and (B) Binding isotherm of 40 bp dsDNA (28-230  $\mu\text{M}$ ) with 38  $\mu\text{M}$  5FW BPTF. W2950 is the WPF shelf tryptophan in BPTF, colored red. The change in the chemical shift ( $\Delta\delta$ ) is shown in purple and is indicated by the dashed line.



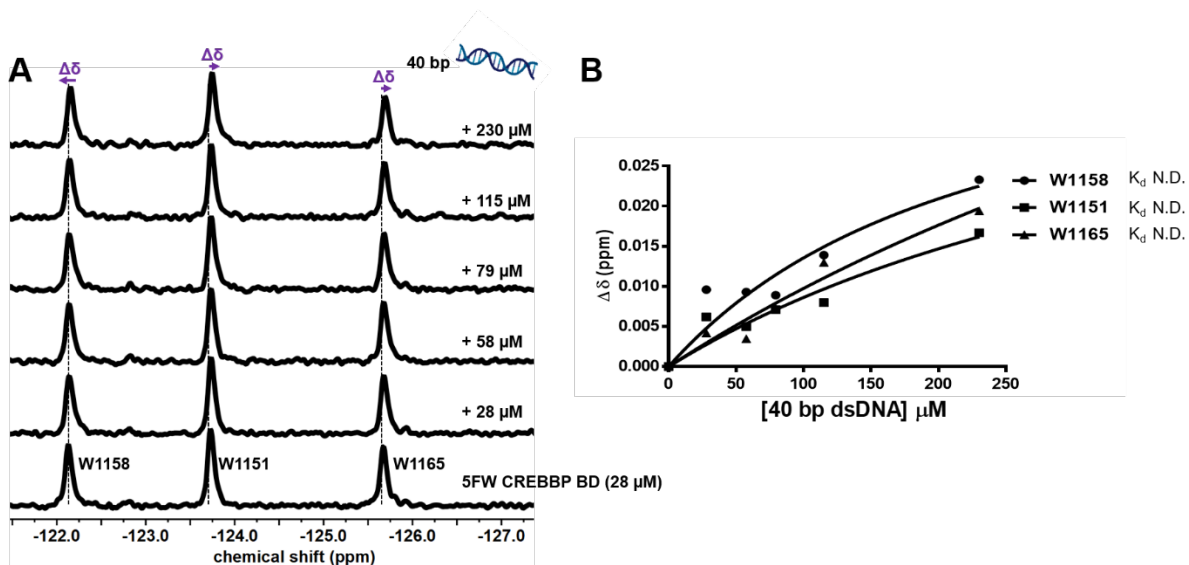

**Figure S49:** PrOF NMR experiments with 40 bp dsDNA binding to 5FW CREBBP. (A) Stacked <sup>19</sup>F NMR spectra and (B) Binding isotherm of 40 bp dsDNA (28-230  $\mu$ M) with 28  $\mu$ M 5FW CREBBP. W1151, W1158, and W1165 are tryptophans situated on the  $\alpha$ B-helix of CREBBP BD, colored red. The change in the chemical shift ( $\Delta\delta$ ) is shown in purple and is indicated by the dashed line.

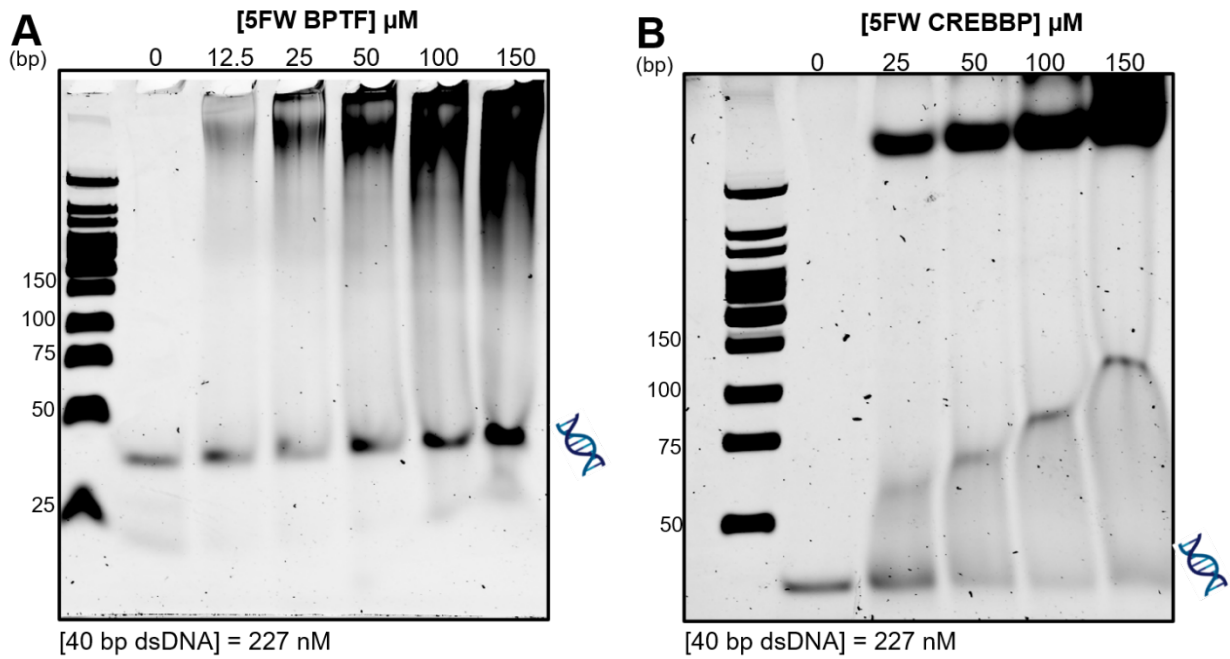

**Figure S50:** EMSA titrations of (A) 5FW BPTF and (B) 5FW CREBBP with 40 bp dsDNA.

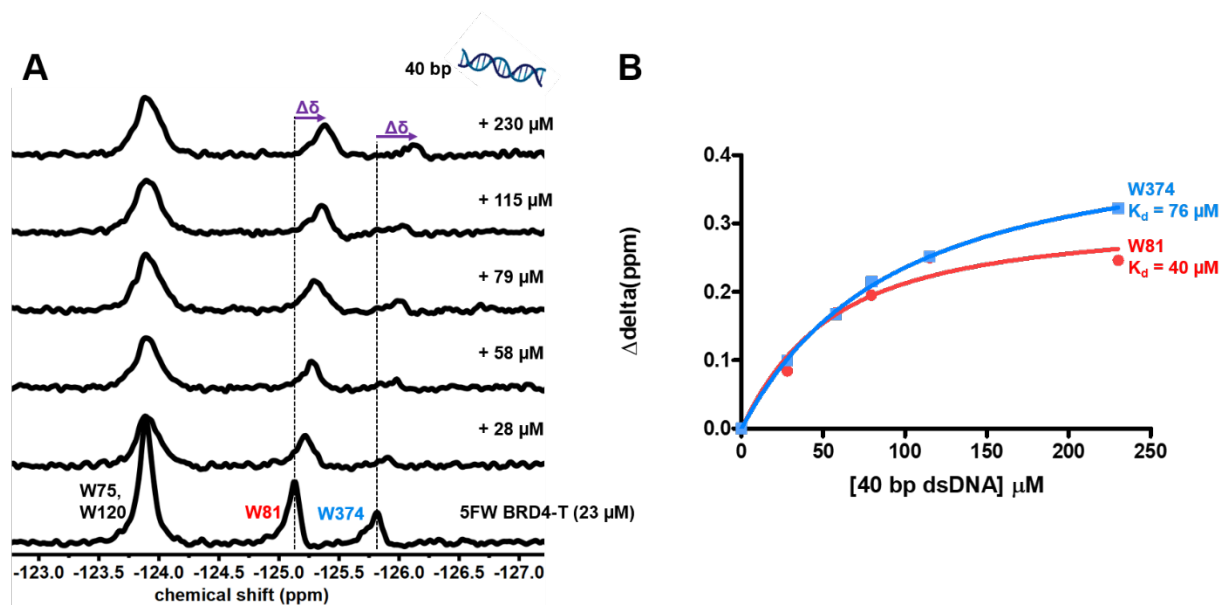

**Figure S51:** PrOF NMR experiments with 40 bp dsDNA binding to 5FW BRD4-T. (A) Stacked  $^{19}\text{F}$  NMR spectra and (B) Binding isotherm of 40 bp dsDNA (28-230  $\mu\text{M}$ ) with 23  $\mu\text{M}$  5FW BRD4-T. W81 and W374 are the WPF shelf tryptophans in BD1 and BD2, colored red and blue respectively. The change in the chemical shift ( $\Delta\delta$ ) is shown in purple and is indicated by the dashed line.

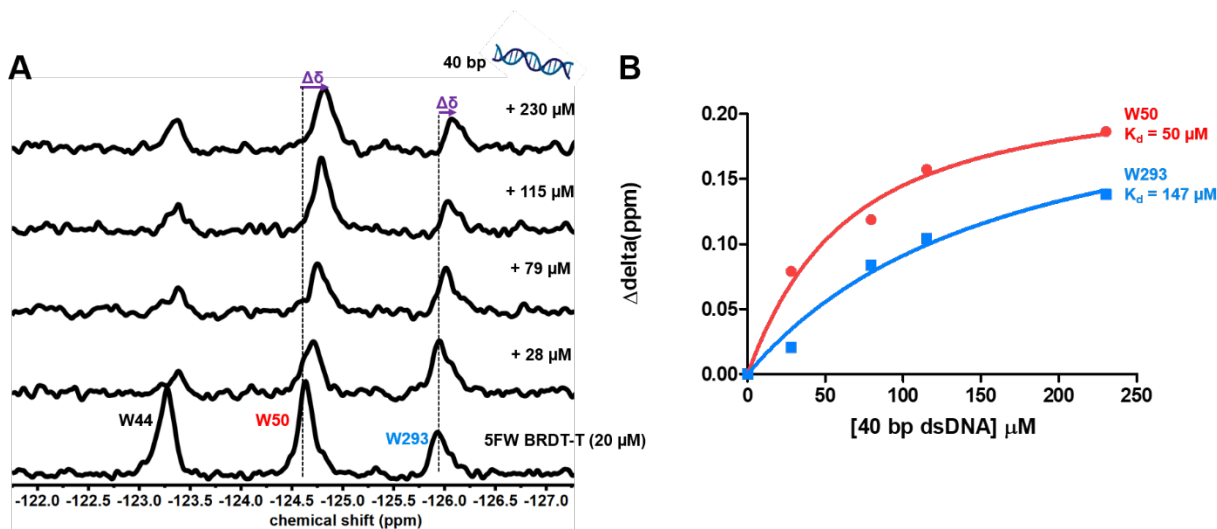

**Figure S52:** PrOF NMR experiments with 40 bp dsDNA binding to 5FW BRDT-T. (A) Stacked  $^{19}\text{F}$  NMR spectra and (B) Binding isotherm of 40 bp dsDNA (28-230  $\mu\text{M}$ ) with 20  $\mu\text{M}$  5FW BRDT-T. W50 and W293 are the WPF shelf tryptophans in BD1 and BD2, colored red and blue respectively. The change in the chemical shift ( $\Delta\delta$ ) is shown in purple and is indicated by the dashed line.

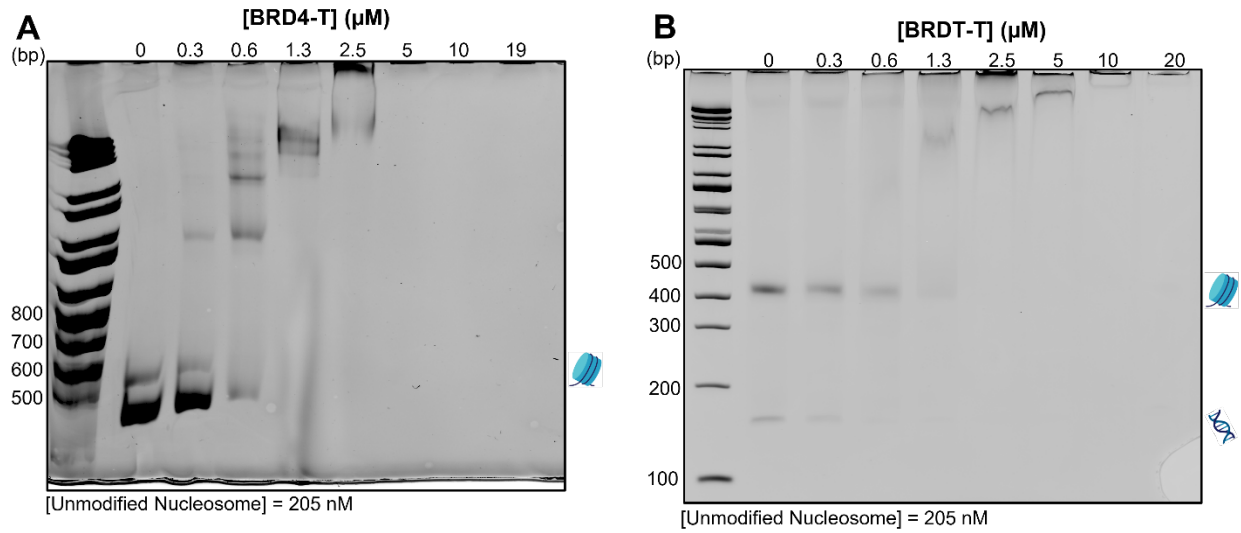

**Figure S53:** EMSA titrations of BRD4-T with (A) unmodified nucleosomes and (B) 40 bp dsDNA.

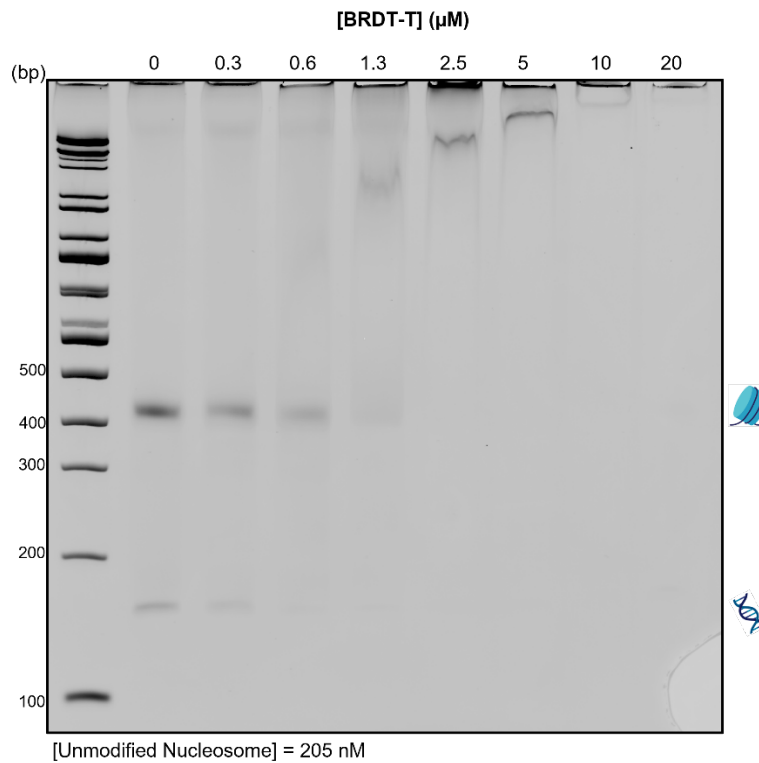

**Figure S54:** EMSA titration of BRDT-T with the unmodified nucleosome.

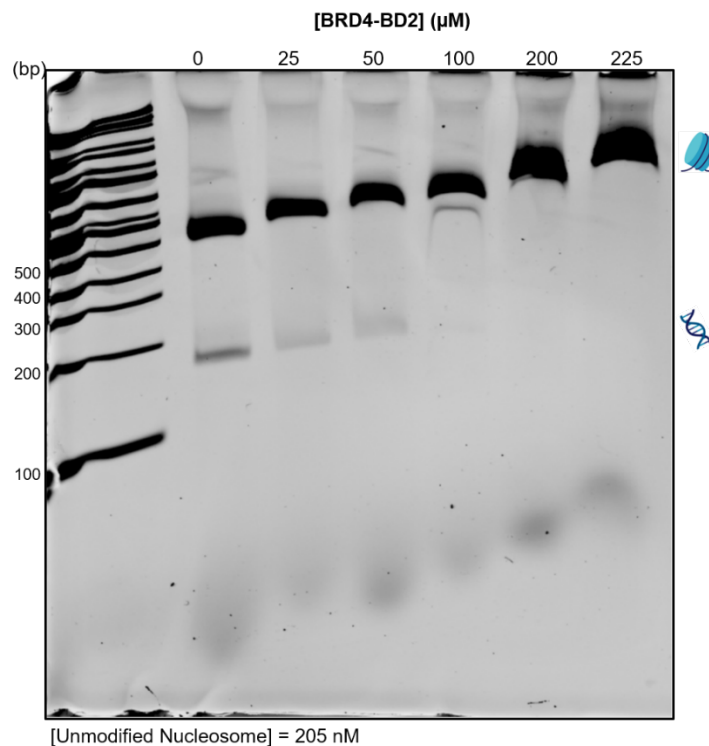

**Figure S55:** EMSA titration of BRD4-BD2 with the unmodified nucleosome.

**HPLC analytical purity traces for H4 K5Ac,K8Ac,K12Ac,K16Ac.** Peptide purity was assessed with a Dionex Ultimate RP-HPLC system using a Vydac C-18 column and a 0-50% CH<sub>3</sub>CN gradient over 50 min. Traces are shown below.

| Gradient | Analytical trace |
|----------|------------------|
|----------|------------------|

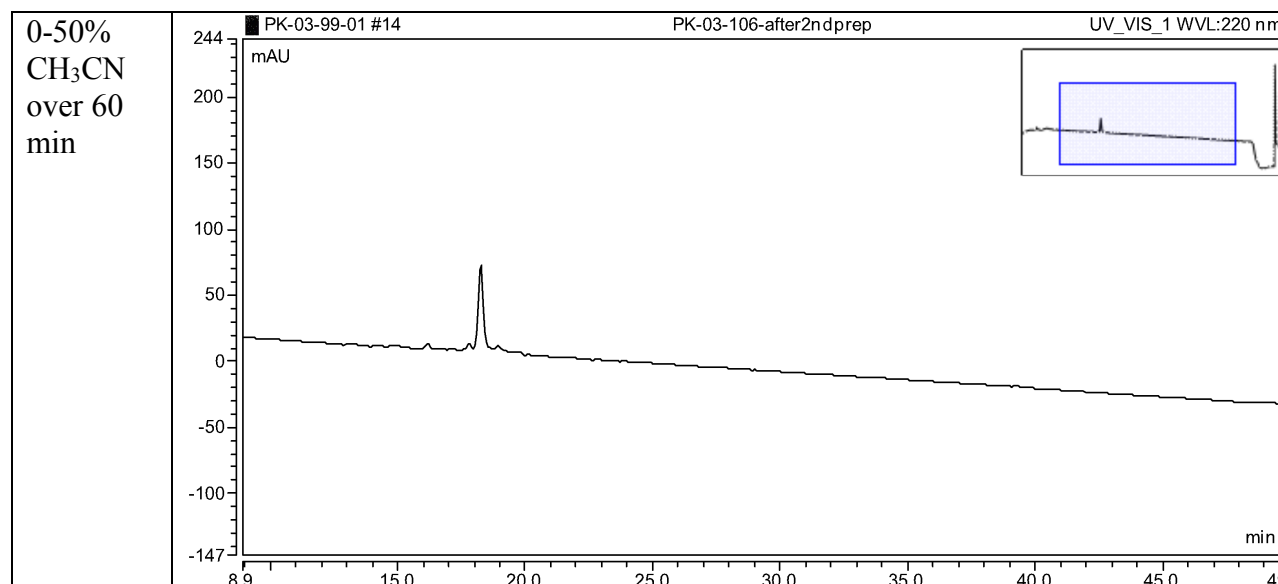

## REFERENCES:

- (1) Miller, T. C. R.; Simon, B.; Rybin, V.; Grötsch, H.; Curtet, S.; Khochbin, S.; Carlomagno, T.; Müller, C. W. A Bromodomain-DNA Interaction Facilitates Acetylation-Dependent Bivalent Nucleosome Recognition by the BET Protein BRDT. *Nat. Commun.* **2016**, *7*, 13855. <https://doi.org/10.1038/ncomms13855>.
- (2) Paul, N. K.; Baksh, K. A.; Arias, J. F.; Zamble, D. B. The Impact of a His-Tag on DNA Binding by RNA Polymerase Alpha-C-Terminal Domain from *Helicobacter Pylori*. *Protein Expr. Purif.* **2020**, *167* (August 2019), 105541. <https://doi.org/10.1016/j.pep.2019.105541>.
- (3) Olson, N. M.; Kroc, S.; Johnson, J. A.; Zahid, H.; Ycas, P. D.; Chan, A.; Kimbrough, J. R.; Kalra, P.; Schönbrunn, E.; Pomerantz, W. C. K. NMR Analyses of Acetylated H2A.Z Isoforms Identify Differential Binding Interactions with the Bromodomain of the NURF Nucleosome Remodeling Complex. *Biochemistry* **2020**, *59* (20), 1871–1880.

<https://doi.org/10.1021/acs.biochem.0c00159>.
